# Supplementary material
Source: PubMed Central journal article supplement (PMC3511985)
Supplement: mmc1.pdf [file mmc1.pdf]

**The American Journal of Human Genetics, Volume 91**

**Supplemental Data**

**Burden of Rare Sarcomere Gene Variants  
in the Framingham and Jackson Heart Study Cohorts**

Alexander G. Bick, Jason Flannick, Kaoru Ito, Susan Cheng, Ramachandran S. Vasani, Michael G. Parfenov, Daniel S. Herman, Steven R. DePalma, Namrata Gupta, Stacey B. Gabriel, Birgit H. Funke, Heidi L. Rehm, Emelia J. Benjamin, Jayashri Aragam, Herman A. Taylor Jr., Ervin R. Fox, Christopher Newton-Cheh, Sekar Kathiresan, Christopher J. O'Donnell, James G. Wilson, David M. Altshuler, Joel N. Hirschhorn, J. G. Seidman, Christine Seidman

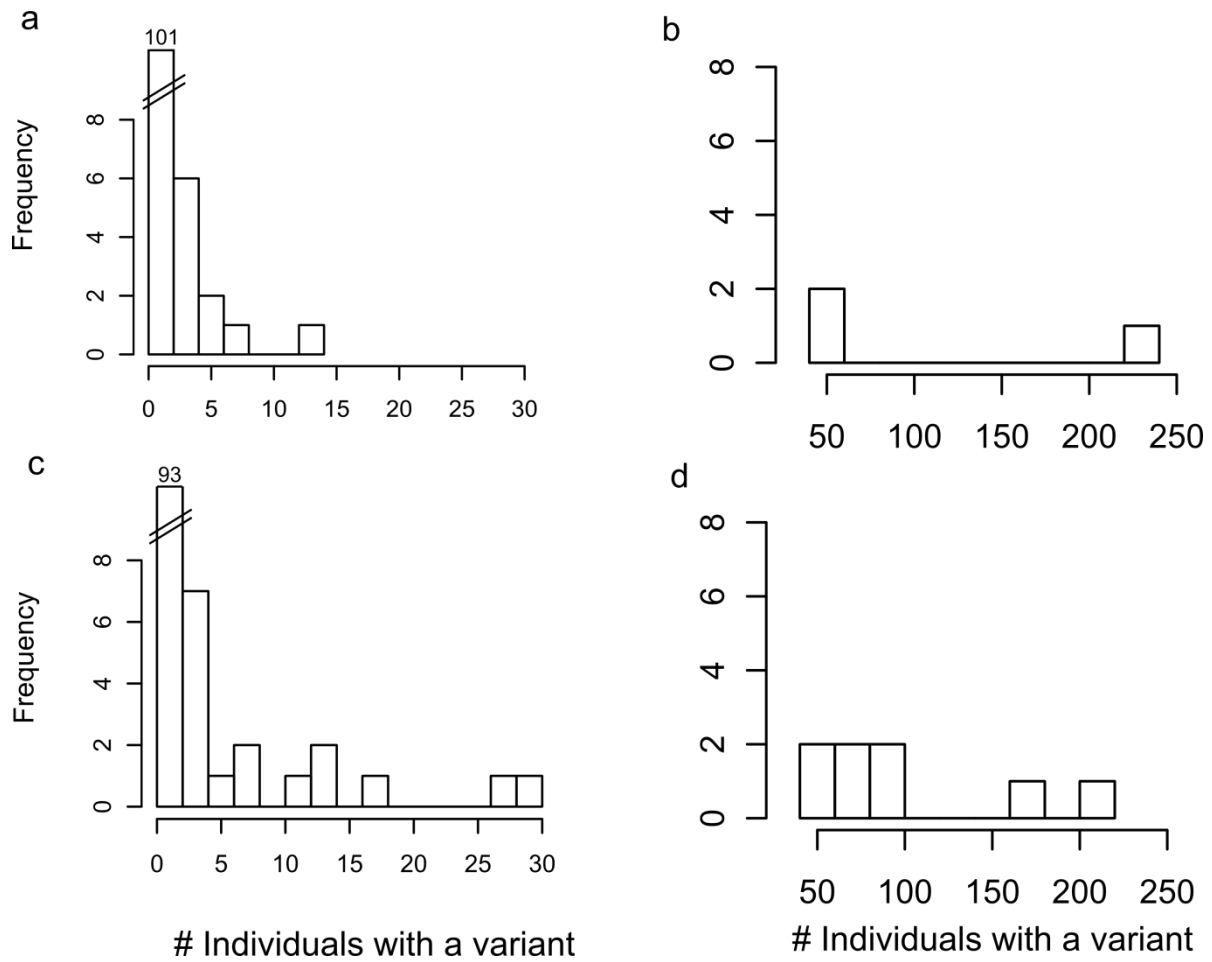

**Figure S1. Sarcomere variant allelic frequency spectrum**

Histogram of FHS (a,b) and JHS variant distribution (c,d) at MAF <1% (a,c) and MAF between 1% and 10% (b,d).

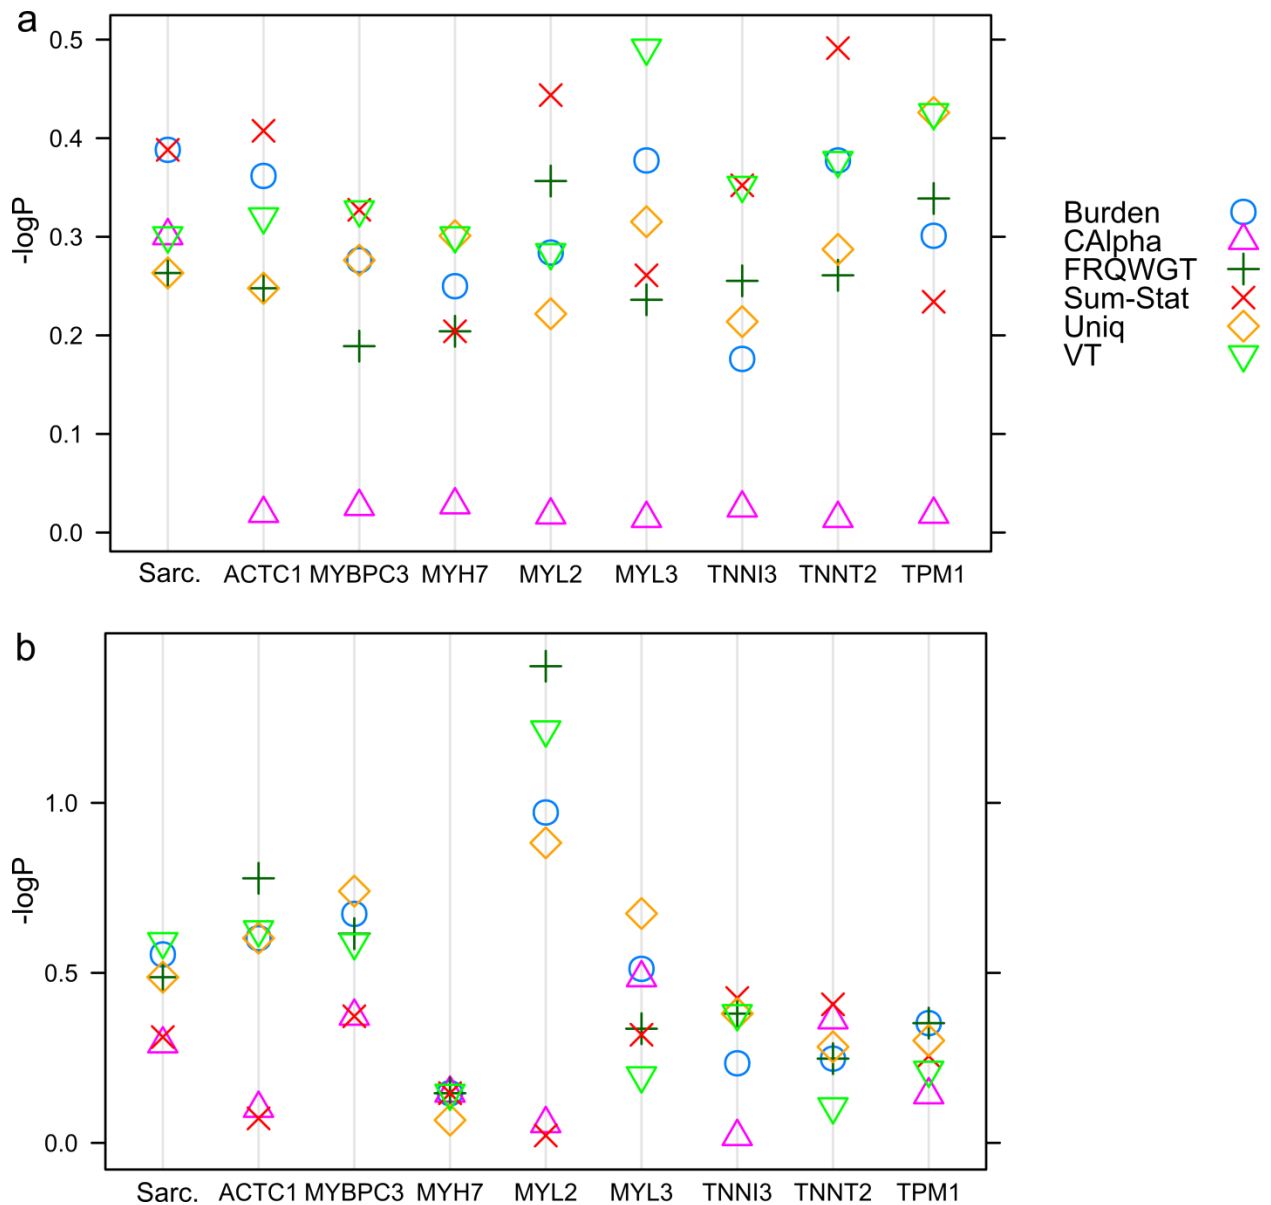

**Figure S2. Burden testing of sarcomere variants**

Burden testing of sarcomere genes for (a) LVWT and (b) change in LVWT over time in the FHS cohort yields statistically insignificant results ( $\log P < 2$ ) when pooling all of the sarcomere variants (Sarc.) or when considering the eight sarcomere genes individually. Statistical tests computed include burden testing of cases compared to controls (Burden), C-alpha test (CAAlpha), count of case-unique rare alleles (Uniq), variable threshold test (VT), frequency-weighted test (FRQWGT), and sum of single site statistics (Sum-Stat).

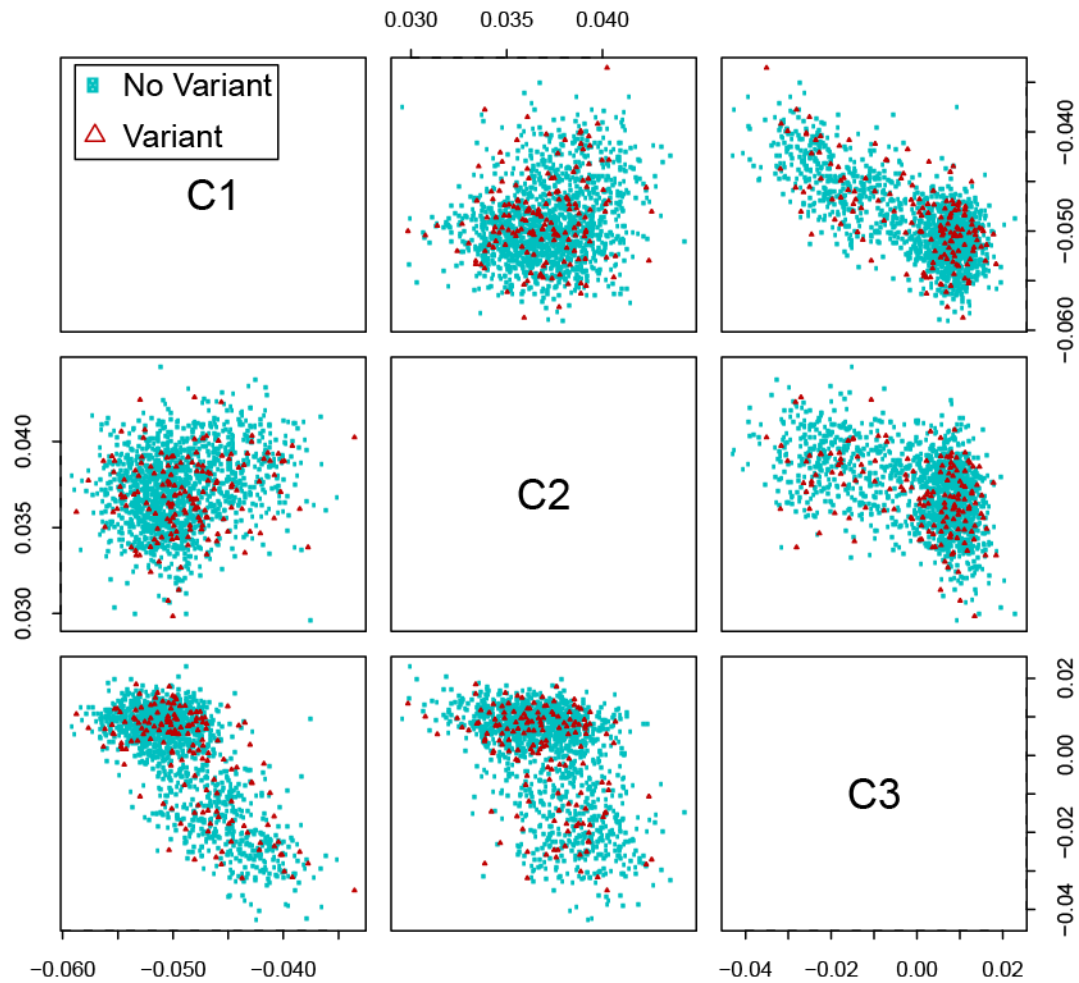

**Figure S3. Multidimensional scaling values of FHS rare sarcomere variant carriers**

Visual representation of the first three principle components of genetic variation computed based on FHS cohort SNP microarray data illustrates that differences in rare sarcomere variant carrier status was not the result of population stratification resulting from ancestry differences.

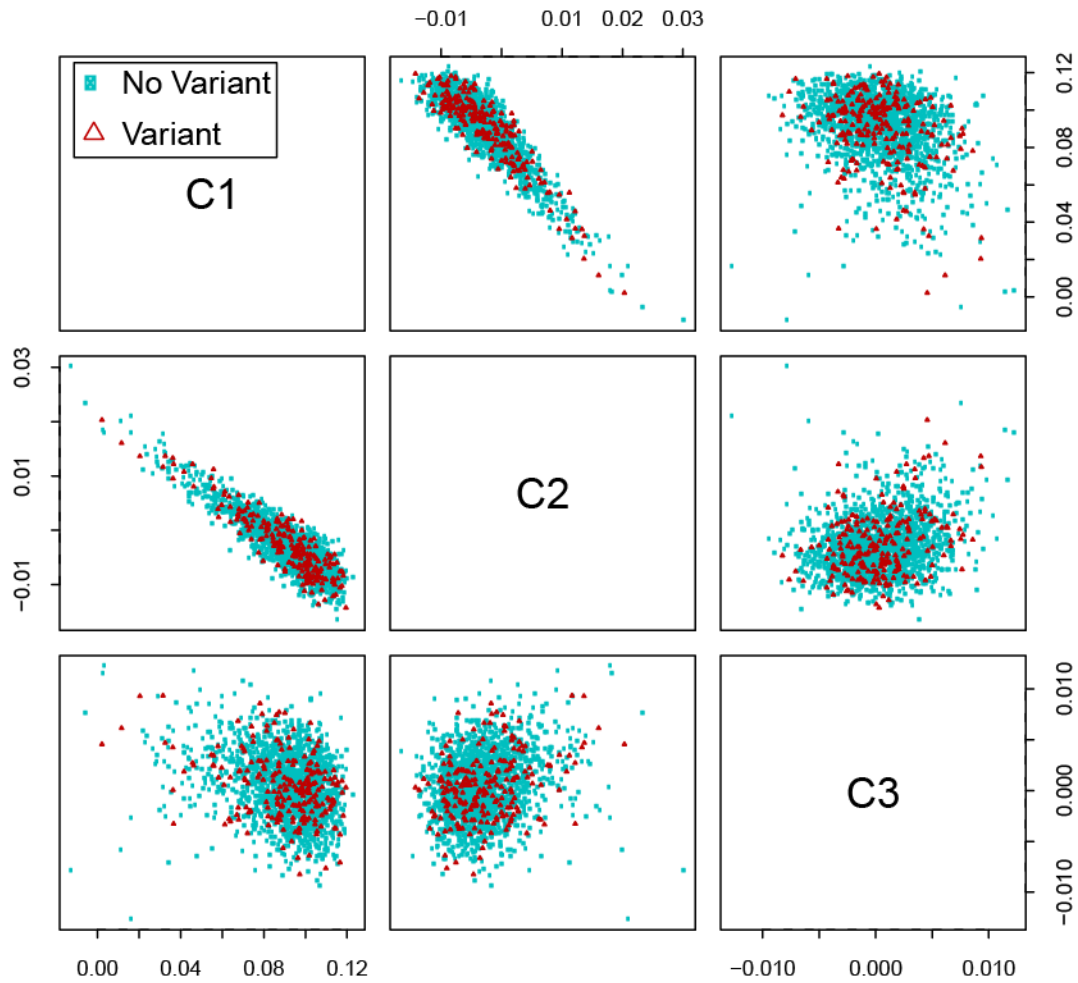

**Figure S4. Multidimensional scaling values of JHS rare sarcomere variant carriers**

Visual representation of the first three principle components of genetic variation computed based on FJHS cohort SNP microarray data illustrates that differences in rare sarcomere variant carrier status was not the result of population stratification resulting from ancestry differences.

**Table S1 List of genes sequenced and quality control metrics**

| NAME <sup>a</sup>              | POS                            | N<br>EXON | Framingham Heart Study |      |       |              |      | Jackson Heart Study |      |       |              |      |
|--------------------------------|--------------------------------|-----------|------------------------|------|-------|--------------|------|---------------------|------|-------|--------------|------|
|                                |                                |           | DENS                   | RATE | TI TV | BASES<br>20x | GC   | DENS                | RATE | TI TV | BASES<br>20x | GC   |
| <i>ACTC1</i><br>NM_005159.4    | chr15:35082563..<br>35088059   | 6         | 68.4                   | 0.86 | 2.08  | 0.84         | 0.56 | 75.4                | 1.00 | 2.3   | 0.99         | 0.52 |
| <i>MYBPC3</i><br>NM_000256.3   | chr11:47353372..<br>47375248   | 32        | 62.7                   | 0.93 | 3.41  | 0.86         | 0.63 | 37.2                | 0.98 | 3.8   | 0.96         | 0.63 |
| <i>MYH7</i><br>NM_000257.2     | chr14:23882013..<br>23903991   | 38        | 66.3                   | 0.99 | 3.10  | 0.97         | 0.57 | 55.4                | 1.00 | 3.8   | 1.00         | 0.58 |
| <i>MYL2</i><br>NM_000432.3     | chr12:111348831..<br>111359383 | 7         | 52.4                   | 0.99 | 3.67  | 0.97         | 0.54 | 30.4                | 1.00 | 1.9   | 1.00         | 0.54 |
| <i>MYL3</i><br>NM_000258.2     | chr3:46899684..<br>46905930    | 6         | 56.1                   | 1.00 | 2.90  | 0.99         | 0.59 | 47.5                | 1.00 | 2.1   | 1.00         | 0.59 |
| <i>TNNI3</i><br>NM_000363.4    | chr19:55663152..<br>55670007   | 8         | 54.1                   | 0.93 | 2.00  | 0.75         | 0.61 | 42.2                | 0.96 | 1.8   | 0.85         | 0.62 |
| <i>TNNT2</i><br>NM_001001430.1 | chr1:201328288..<br>201343432  | 15        | 46.5                   | 1.00 | 3.06  | 0.96         | 0.56 | 42.8                | 1.00 | 3.0   | 0.98         | 0.57 |
| <i>TPM1</i><br>NM_001018005.1  | chr15:63333979..<br>63363421   | 15        | 74.0                   | 0.84 | 1.36  | 0.67         | 0.56 | 47.5                | 0.88 | 2.3   | 0.76         | 0.53 |

POS, genomic position. N EXON, number of exons in a gene. DENS, sequencing density. RATE, rate of base calling. TI TV, ratio of the number of transitions to the number of transversions, BASES 20x, fraction of bases with at least 20x coverage. GC, ratio of Guanine to Cytosine bases in a gene.

<sup>a</sup>Variant calls made throughout this study are based on the RefSeq gene version indicated.

**Table S2. Rare variants (MAF<1%) in eight sarcomere genes identified in FHS participants and their echocardiography data and physiologic risk factors**

| ID | GENE          | LMM         | pp HCM  | Call                     | Prot               | Age | LVWT | LVDD | LAD  | FS   | N Phys. Risk Factors |
|----|---------------|-------------|---------|--------------------------|--------------------|-----|------|------|------|------|----------------------|
| 1  | <i>MYL2</i>   | Likely Path | Path    | chr12:111353547C>A       | p.Asn47Lys         | 59  | 0.88 | 4.78 | 4.25 | 0.35 | 2                    |
| 2  | <i>MYBPC3</i> | No call     | VUS     | chr11:47355487C>T        | p.Leu994Phe        | 46  | 0.82 | 4.71 | 3.75 | 0.38 | 0                    |
| 3  | <i>MYBPC3</i> | Ben         | VUS     | chr11:47367871G>A        | p.Arg326Gln        | 49  | 0.99 | 4.79 | 4.2  | 0.38 | 1                    |
| 4  | <i>MYL3</i>   | VUS         | VUS     | chr3:46900980G>A         | p.Val156Met        | 68  | 1.27 | 4.94 | 4.44 | 0.44 | 1                    |
| 5  | <i>MYH7</i>   | No call     | Path    | chr14:23883232G>A        | p.Arg1880His       | 51  | 1.02 | 4.5  | 3.7  | 0.37 | 1                    |
| 6  | <i>MYBPC3</i> | VUS         | VUS     | chr11:47356691C>T        | p.Thr936Met        | 71  | 0.96 | 5.12 | 3.9  | 0.39 | 0                    |
| 7  | <i>MYBPC3</i> | VUS         | Ben     | chr11:47371619G>A        | p.Asp151Asn        | 61  | 1.1  | 4.9  | 4.49 | 0.35 | 2                    |
| 8  | <i>MYBPC3</i> | No call     | VUS     | chr11:47362770G>A        | p.Val60Ile         | 54  | 0.94 | 4.7  | 3.92 | 0.29 | 1                    |
| 9  | <i>MYBPC3</i> | Ben         | VUS     | chr11:47371592C>T        | p.Arg160Trp        | 67  | 1.24 | 4.59 | 4.05 | 0.44 | 0                    |
| 10 | <i>MYH7</i>   | No call     | Ben     | chr14:23898237C>T        | p.Ala445Val        | 64  | 1.19 | 4.86 | 4.64 | 0.34 | 2                    |
| 11 | <i>MYBPC3</i> | Path        | No call | chr11:47360120G>GA       | p.Asn755Gluufs X78 | 82  | 1.29 | 4.99 | 4.48 | 0.33 | 2                    |
| 12 | <i>MYH7</i>   | No call     | Ben     | chr14:23884630G>A        | p.Cys1748Tyr       | 65  | 0.9  | 5    | 3.8  | 0.4  | 2                    |
| 13 | <i>MYH7</i>   | VUS         | Path    | chr14:23892910T>C        | p.Met982Thr        | 71  | 1.03 | 5.4  | 3.41 | 0.44 | 0                    |
| 14 | <i>MYBPC3</i> | Lik Ben     | Ben     | chr11:47371330A>G        | p.Ser217Gly        | 53  | 1.04 | 5.11 | 4.31 | 0.39 | 2                    |
| 15 | <i>MYL2</i>   | VUS         | Path    | chr12:111348954C>T       | p.Pro143Leu        | 55  | 0.97 | 4.89 | 2.88 | 0.37 | 0                    |
| 16 | <i>MYBPC3</i> | Ben         | Ben     | chr11:47371414G>A        | p.Val189Ile        | 73  | 1.27 | 5.44 | 5.01 | 0.45 | 3                    |
| 17 | <i>MYBPC3</i> | Lik Ben     | VUS     | chr11:47359047G>A        | p.Ala833Thr        | NA  | NA   | NA   | NA   | NA   | NA                   |
| 18 | <i>MYBPC3</i> | Ben         | Ben     | chr11:47371414G>A        | p.Val189Ile        | 50  | 0.86 | 4.71 | 3.52 | 0.36 | 0                    |
| 18 | <i>MYH7</i>   | No call     | VUS     | chr14:23887578G>A        | p.Arg1337Gln       | 50  | 0.86 | 4.71 | 3.52 | 0.36 | 0                    |
| 19 | <i>MYBPC3</i> | No call     | VUS     | chr11:47355189C>T        | p.Arg1037Cys       | 57  | 0.92 | 4.39 | 3.54 | 0.38 | 0                    |
| 20 | <i>MYBPC3</i> | VUS         | Ben     | chr11:47372898A>C        | p.Thr62Pro         | 71  | 0.97 | 4.41 | 4.64 | 0.33 | 2                    |
| 20 | <i>MYH7</i>   | No call     | VUS     | chr14:23898283G>A        | p.Ala430Thr        | 71  | 0.97 | 4.41 | 4.64 | 0.33 | 2                    |
| 21 | <i>MYH7</i>   | No call     | Path    | chr14:23893183G>C        | p.Arg952Thr        | 45  | 1.11 | 6.08 | 3.9  | 0.3  | 1                    |
| 22 | <i>MYH7</i>   | No call     | Path    | chr14:23884860G>C        | p.Arg1712Pro       | 56  | 1.02 | 4.98 | 3.78 | 0.42 | 1                    |
| 23 | <i>ACTC1</i>  | No call     | VUS     | chr15:35086937G>A        | p.Gly25Ser         | 52  | 1.16 | 4.26 | 3.63 | 0.45 | 1                    |
| 24 | <i>MYBPC3</i> | No call     | VUS     | chr11:47371375A>C        | p.Lys202Gln        | 73  | 1.09 | 4.83 | 4.44 | 0.31 | 0                    |
| 25 | <i>MYBPC3</i> | Ben         | Ben     | chr11:47371414G>A        | p.Val189Ile        | 68  | 0.99 | 4.26 | 4.2  | 0.37 | 1                    |
| 26 | <i>MYH7</i>   | VUS         | Path    | chr14:23892910T>C        | p.Met982Thr        | 82  | 0.97 | 5    | 4.35 | 0.43 | NA                   |
| 27 | <i>MYBPC3</i> | VUS         | Ben     | chr11:47360169C>T        | p.Thr737Met        | 57  | 1.14 | 4.28 | 4.19 | 0.36 | 2                    |
| 28 | <i>MYH7</i>   | VUS         | Path    | chr14:23892910T>C        | p.Met982Thr        | 64  | 1    | 4.4  | 4.71 | 0.48 | 1                    |
| 29 | <i>MYBPC3</i> | Ben         | Ben     | chr11:47371414G>A        | p.Val189Ile        | 58  | 1.13 | 4.83 | 4.81 | 0.37 | 2                    |
| 30 | <i>MYBPC3</i> | Ben         | VUS     | chr11:47367871G>A        | p.Arg326Gln        | 52  | 1.13 | 5.38 | 4.38 | 0.32 | 3                    |
| 31 | <i>TNNT2</i>  | No call     | VUS     | chr1:201331068T>C        | p.Ile221Thr        | 51  | 0.95 | 4.41 | 3.76 | 0.38 | 1                    |
| 32 | <i>MYBPC3</i> | Ben         | VUS     | chr11:47367871G>A        | p.Arg326Gln        | 72  | 1    | 5.7  | 3.92 | 0.3  | 1                    |
| 33 | <i>TPM1</i>   | No call     | Path    | chr15:63353107G>A        | p.Arg178Cys        | 78  | 1.18 | 5.79 | 4.21 | 0.36 | 2                    |
| 34 | <i>MYBPC3</i> | Lik Ben     | VUS     | chr11:47359047G>A        | p.Ala833Thr        | 55  | 1.02 | 4.5  | 3.92 | 0.4  | 2                    |
| 35 | <i>MYBPC3</i> | No call     | Ben     | chr11:47365049G>A        | p.Ser406Asn        | 69  | 1.11 | 5.65 | 3.29 | 0.43 | 2                    |
| 36 | <i>MYH7</i>   | VUS         | VUS     | chr14:23886504G>T        | p.Lys1459Asn       | 52  | 1.1  | 4.64 | 4.24 | 0.37 | 1                    |
| 37 | <i>MYBPC3</i> | Ben         | Ben     | chr11:47371414G>A        | p.Val189Ile        | 53  | 1.09 | 4.92 | 4.14 | 0.34 | 1                    |
| 38 | <i>MYH7</i>   | No call     | Path    | chr14:23885293A>T        | p.Met1625Leu       | 69  | 1.13 | 4.26 | 3.94 | 0.46 | 0                    |
| 39 | <i>MYBPC3</i> | VUS         | Ben     | chr11:47371355G>C        | p.Gln208His        | 50  | 0.89 | 4.81 | 3.97 | 0.35 | 4                    |
| 40 | <i>MYBPC3</i> | VUS         | Ben     | chr11:47371450C>T        | p.Arg177Cys        | 50  | NA   | NA   | 3    | NA   | 1                    |
| 41 | <i>MYBPC3</i> | No call     | VUS     | chr11:47362736T>G        | p.Val617Gly        | 64  | 1.06 | 4.22 | 4.05 | 0.36 | 1                    |
| 42 | <i>MYL3</i>   | Likely Path | VUS     | chr3:46902303C>G         | p.Ala57Gly         | 69  | 1.06 | 4.8  | 4.34 | 0.32 | 0                    |
| 43 | <i>MYBPC3</i> | Ben         | Ben     | chr11:47371414G>A        | p.Val189Ile        | 73  | 1.04 | 4.23 | 4.25 | 0.45 | 2                    |
| 44 | <i>MYH7</i>   | No call     | VUS     | chr14:23894555C>T        | p.Arg787Cys        | 47  | 1.12 | 4.45 | 4.02 | 0.35 | 0                    |
| 45 | <i>MYL2</i>   | No call     | VUS     | chr12:111356985GAA AGA>G | p.Lys3Trpfs5X      | 65  | 0.99 | 5.31 | 3.96 | 0.4  | 3                    |
| 46 | <i>MYBPC3</i> | Ben         | VUS     | chr11:47367871G>A        | p.Arg326Gln        | 46  | 1.1  | 5.3  | 4.31 | 0.36 | 4                    |
| 47 | <i>MYBPC3</i> | VUS         | Ben     | chr11:47371628G>A        | p.Gly148Arg        | 56  | 1.03 | 5.17 | 3.88 | 0.39 | 0                    |
| 48 | <i>MYL3</i>   | Likely Path | VUS     | chr3:46902303C>G         | p.Ala57Gly         | 57  | 0.9  | 5.4  | 3.53 | 0.33 | 4                    |
| 49 | <i>MYBPC3</i> | No call     | VUS     | chr11:47354454G>A        | p.Gly1134Asp       | 65  | 0.96 | 5.47 | 4.11 | 0.37 | 1                    |
| 50 | <i>MYL2</i>   | Likely Path | Path    | chr12:111353547C>A       | p.Asn47Lys         | 58  | 1.14 | 4.23 | 4.11 | 0.46 | 0                    |
| 51 | <i>MYBPC3</i> | VUS         | Ben     | chr11:47364189G>A        | p.Ala522Thr        | 58  | 1.05 | 4.6  | 4.04 | 0.35 | 2                    |
| 52 | <i>MYBPC3</i> | VUS         | VUS     | chr11:47364602G>A        | p.Glu441Lys        | 52  | 1    | 4.2  | 2.8  | 0.38 | 1                    |
| 53 | <i>MYBPC3</i> | Ben         | Ben     | chr11:47371414G>A        | p.Val189Ile        | 48  | 1.1  | 5    | 4.6  | 0.36 | 3                    |
| 54 | <i>TNNT2</i>  | Ben         | Path    | chr1:201337340C>T        | p.Ala28Val         | 64  | 1.56 | 4.06 | 3.78 | 0.41 | 1                    |
| 55 | <i>MYH7</i>   | VUS         | Path    | chr14:23886807C>T        | p.Arg1420Trp       | 57  | 1    | 4.8  | 4.02 | 0.29 | 1                    |
| 56 | <i>MYBPC3</i> | VUS         | Ben     | chr11:47362731G>A        | p.Glu619Lys        | 65  | 1.01 | 4.5  | 4.28 | 0.41 | 2                    |

|     |        |             |         |                    |              |    |      |      |      |      |    |
|-----|--------|-------------|---------|--------------------|--------------|----|------|------|------|------|----|
| 57  | MYBPC3 | VUS         | Ben     | chr11:47356625C>T  | p.Thr958Ile  | 51 | 1    | 5.26 | 4.41 | 0.25 | 1  |
| 58  | MYH7   | No call     | Path    | chr14:23884470A>G  | p.Met1765Val | 55 | 0.84 | 3.8  | 3.56 | 0.38 | 1  |
| 59  | MYBPC3 | VUS         | Ben     | chr11:47356628C>G  | p.Thr957Ser  | 61 | NA   | 5.4  | 3.71 | 0.41 | 1  |
| 60  | MYL3   | VUS         | VUS     | chr3:46900980G>A   | p.Val156Met  | 62 | 0.99 | 5    | 3.39 | 0.44 | 1  |
| 61  | MYBPC3 | VUS         | Ben     | chr11:47356628C>G  | p.Thr957Ser  | 65 | 1.06 | 4.4  | 4.09 | 0.43 | 0  |
| 62  | TNNT2  | VUS         | VUS     | chr1:201330453C>T  | p.Ala245Val  | 69 | 1.07 | 6.35 | 4.84 | 0.19 | 1  |
| 63  | MYH7   | VUS         | VUS     | chr14:23899810G>A  | p.Val320Met  | 41 | 1    | 4.2  | 3.83 | 0.38 | 0  |
| 64  | MYH7   | No call     | Ben     | chr14:23883087A>G  | p.Thr1891Ala | 72 | 0.98 | 5.11 | 4.28 | 0.41 | 2  |
| 65  | MYBPC3 | Ben         | Ben     | chr11:47371414G>A  | p.Val189Ile  | 62 | 0.72 | 4.59 | 3.97 | 0.37 | 1  |
| 66  | MYBPC3 | No call     | VUS     | chr11:47355552G>A  | p.Arg972Gln  | 48 | 0.9  | 4.37 | 2.94 | 0.35 | 0  |
| 67  | MYBPC3 | No call     | VUS     | chr11:47362778T>C  | p.Ile603Thr  | 53 | 1.05 | 4.8  | 5.32 | 0.37 | 1  |
| 68  | MYBPC3 | VUS         | VUS     | chr11:47362758G>C  | p.Asp610His  | 64 | 1.05 | 4.9  | 4.77 | 0.35 | 2  |
| 69  | MYBPC3 | VUS         | Ben     | chr11:47371355G>C  | p.Gln208His  | 68 | 1.03 | 4.52 | 3.85 | 0.43 | 2  |
| 70  | MYBPC3 | VUS         | VUS     | chr11:47364465G>A  | p.Arg458His  | 73 | NA   | NA   | 5.4  | NA   | 2  |
| 71  | MYBPC3 | Ben         | VUS     | chr11:47355294C>T  | p.Arg1002Trp | 51 | 0.9  | 4.3  | 3.1  | 0.4  | 1  |
| 72  | MYH7   | Likely Path | Path    | chr14:23884256C>T  | p.Ser1836Leu | 58 | 0.99 | 4.87 | 3.81 | 0.32 | 1  |
| 73  | MYBPC3 | No call     | VUS     | chr11:47355487C>T  | p.Leu994Phe  | 60 | 1.09 | 5.21 | 4.13 | 0.36 | 0  |
| 74  | MYBPC3 | VUS         | Ben     | chr11:47356628C>G  | p.Thr957Ser  | 63 | 1.14 | 5.17 | 4.1  | 0.3  | 1  |
| 75  | MYH7   | No call     | Path    | chr14:23894546G>A  | p.Ala790Thr  | 61 | 1.22 | 5.15 | 3.82 | 0.32 | 1  |
| 76  | MYBPC3 | VUS         | VUS     | chr11:47359115G>A  | p.Arg810His  | 40 | 1.1  | 5.4  | 4.7  | 0.33 | 4  |
| 77  | MYL3   | No call     | VUS     | chr3:46899876A>C   | p.Glu186Ala  | 50 | 0.82 | 4.43 | 3.17 | 0.39 | 0  |
| 78  | MYBPC3 | VUS         | VUS     | chr11:47354463T>C  | p.Ile1131Thr | 71 | 0.89 | 4.95 | 4.29 | 0.38 | 1  |
| 79  | MYBPC3 | VUS         | VUS     | chr11:47367887G>A  | p.Val321Met  | 60 | 1.18 | 5.56 | 4.35 | 0.35 | 0  |
| 80  | MYBPC3 | Ben         | VUS     | chr11:47367871G>A  | p.Arg326Gln  | 49 | 0.93 | 4.98 | 4.05 | 0.28 | 3  |
| 81  | MYBPC3 | Ben         | Ben     | chr11:47371333G>A  | p.Ala216Thr  | 63 | 0.89 | 4.31 | 3.86 | 0.32 | 2  |
| 82  | MYBPC3 | VUS         | Ben     | chr11:47360169C>T  | p.Thr737Met  | 58 | 0.84 | 3.93 | 3.47 | 0.35 | 1  |
| 83  | MYH7   | VUS         | Path    | chr14:23893148G>C  | p.Val964Leu  | 59 | 1    | 4.4  | 3.43 | 0.32 | 1  |
| 84  | MYBPC3 | VUS         | VUS     | chr11:47363554C>T  | p.Ser593Phe  | 65 | 1.11 | 5.49 | 4.14 | 0.35 | 4  |
| 85  | MYBPC3 | VUS         | Ben     | chr11:47356628C>G  | p.Thr957Ser  | 69 | 1.14 | 4.3  | 3.63 | 0.32 | 3  |
| 86  | MYL3   | No call     | VUS     | chr3:46899949G>A   | p.Glu162Lys  | 72 | 0.83 | 4.43 | 3.95 | 0.32 | 4  |
| 87  | MYBPC3 | Lik Ben     | Ben     | chr11:47371330A>G  | p.Ser217Gly  | 50 | 0.95 | 5.42 | 4.62 | 0.37 | 4  |
| 88  | MYBPC3 | No call     | VUS     | chr11:47371375A>C  | p.Lys202Gln  | 58 | 1.01 | 4.66 | 3.68 | 0.39 | 1  |
| 89  | MYBPC3 | Lik Ben     | Ben     | chr11:47371330A>G  | p.Ser217Gly  | 65 | 0.87 | 4.43 | 3.51 | 0.39 | 1  |
| 90  | MYBPC3 | Ben         | VUS     | chr11:47355294C>T  | p.Arg1002Trp | 82 | 0.93 | 5    | 3.67 | 0.42 | NA |
| 91  | MYBPC3 | Lik Ben     | Ben     | chr11:47371330A>G  | p.Ser217Gly  | 54 | 0.92 | 4.98 | 4.1  | 0.34 | 4  |
| 92  | TNNT2  | Lik Ben     | VUS     | chr1:201328767A>G  | p.Asn269Asp  | 58 | 1.02 | 5.07 | 4.61 | 0.43 | 1  |
| 93  | MYBPC3 | VUS         | Ben     | chr11:47371628G>A  | p.Gly148Arg  | 71 | 1    | 4.4  | 3.3  | 0.39 | 2  |
| 94  | MYBPC3 | No call     | Ben     | chr11:47371624C>A  | p.Ala149Asp  | 60 | 0.95 | 4.51 | 4.01 | 0.35 | 1  |
| 95  | MYBPC3 | Ben         | VUS     | chr11:47367871G>A  | p.Arg326Gln  | 55 | NA   | NA   | 4.05 | NA   | 3  |
| 96  | MYBPC3 | VUS         | Ben     | chr11:47372898A>C  | p.Thr62Pro   | NA | NA   | NA   | NA   | NA   | NA |
| 97  | MYBPC3 | Ben         | Ben     | chr11:47371414G>A  | p.Val189Ile  | 56 | 0.88 | 3.96 | 3.14 | 0.47 | 1  |
| 98  | MYL3   | VUS         | VUS     | chr3:46899901G>A   | p.Asp178Asn  | 66 | 0.89 | 4.4  | 3.61 | 0.42 | 1  |
| 99  | MYBPC3 | Path        | Path    | chr11:47359280T>C  | p.Trp792Arg  | 53 | 1.1  | 4.6  | 3.1  | 0.3  | 1  |
| 100 | MYBPC3 | Ben         | Ben     | chr11:47371333G>A  | p.Ala216Thr  | 52 | 0.95 | 4.62 | 4.41 | 0.32 | 1  |
| 101 | MYH7   | VUS         | VUS     | chr14:23891398G>A  | p.Arg1079Gln | 62 | 0.89 | 4.78 | 3.54 | 0.36 | 1  |
| 102 | MYBPC3 | Ben         | Ben     | chr11:47371414G>A  | p.Val189Ile  | 53 | 0.82 | 4.73 | 4.35 | 0.35 | 0  |
| 103 | TPM1   | No call     | VUS     | chr15:6353920G>A   | p.Ala191Val  | 54 | 1.02 | 4.66 | 3.66 | 0.38 | 3  |
| 104 | MYBPC3 | VUS         | Ben     | chr11:47360169C>T  | p.Thr737Met  | 38 | 1    | 5    | 4.05 | 0.36 | 3  |
| 105 | MYH7   | No call     | No call | chr14:23886827C>A  | p.Ser1413*   | 46 | 1    | 5.51 | 4.92 | 0.4  | 1  |
| 106 | MYBPC3 | VUS         | VUS     | chr11:47364285G>A  | p.Gly490Arg  | 57 | 1.05 | 5.22 | 4.3  | 0.38 | 4  |
| 107 | MYBPC3 | VUS         | Ben     | chr11:47356625C>T  | p.Thr958Ile  | 54 | 0.97 | 4.6  | 3.69 | 0.42 | 1  |
| 108 | TNNT2  | Lik Path    | VUS     | chr1:201334755G>A  | p.Glu83Lys   | 51 | 0.89 | 4.34 | 3.73 | 0.4  | 1  |
| 109 | TNNT2  | VUS         | No call | chr1:201332519C>T  | p.Arg159*    | 56 | 0.98 | 4.04 | 3.25 | 0.31 | 0  |
| 110 | MYH7   | VUS         | Path    | chr14:23894085C>T  | p.Arg858Cys  | 48 | 0.95 | 4.07 | 3.23 | 0.43 | 0  |
| 111 | MYBPC3 | Ben         | VUS     | chr11:47367871G>A  | p.Arg326Gln  | 63 | 0.99 | 4.58 | 4.04 | 0.35 | 1  |
| 112 | MYBPC3 | VUS         | Ben     | chr11:47364189G>A  | p.Ala522Thr  | 51 | 1    | 5.1  | 3.76 | 0.37 | 3  |
| 113 | MYL2   | VUS         | VUS     | chr12:111356964G>A | p.Ala13Thr   | 52 | 0.93 | 4.73 | 4.2  | 0.34 | 2  |
| 114 | MYL2   | Likely Path | Path    | chr12:111350901A>C | p.Glu134Ala  | 80 | 1.06 | 4.59 | 3.46 | 0.33 | 1  |
| 115 | MYBPC3 | VUS         | VUS     | chr11:47354463T>C  | p.Ile1131Thr | 64 | 1.11 | 5    | 4.24 | 0.28 | 4  |
| 116 | MYL3   | VUS         | VUS     | chr3:46900985G>A   | p.Arg154His  | 48 | 1.04 | 4.43 | 3.87 | 0.35 | 0  |
| 117 | MYBPC3 | VUS         | VUS     | chr11:47354471G>C  | p.Glu1128Asp | 58 | 1.05 | 4.9  | 4.01 | 0.31 | 0  |
| 118 | MYH7   | No call     | Path    | chr14:23894557C>T  | p.Thr786Met  | 70 | 1.1  | 5.8  | 5.06 | 0.38 | 2  |
| 119 | MYL3   | VUS         | VUS     | chr3:46900985G>A   | p.Arg154His  | 60 | 0.89 | 4.64 | 4.16 | 0.38 | 1  |
| 120 | MYBPC3 | Path        | VUS     | chr11:47364249C>T  | p.Arg502Trp  | 71 | 1.07 | 6.25 | 3.86 | 0.17 | 1  |
| 121 | MYBPC3 | No call     | VUS     | chr11:47354752A>C  | p.Lys1108Thr | 76 | 0.8  | 4.7  | 4.63 | NA   | 1  |
| 122 | MYL3   | VUS         | VUS     | chr3:46899901G>A   | p.Asp178Asn  | 58 | 1.19 | 4.85 | 3.91 | 0.4  | 0  |
| 123 | MYBPC3 | No call     | VUS     | chr11:47355529C>T  | p.Arg980Cys  | 45 | 1.07 | 5.34 | 4.44 | 0.31 | 3  |
| 124 | MYBPC3 | VUS         | Ben     | chr11:47356628C>G  | p.Thr957Ser  | 64 | 1.01 | 4.29 | 4.2  | 0.43 | 1  |
| 125 | MYH7   | VUS         | Path    | chr14:23892910T>C  | p.Met982Thr  | 67 | 1.05 | 5.88 | 4.56 | 0.22 | 2  |
| 126 | MYBPC3 | No call     | Ben     | chr11:47355191G>A  | p.Arg1036His | 56 | 0.96 | 4.67 | 3.3  | 0.43 | 3  |



|     |               |             |         |                    |              |    |      |      |      |      |    |
|-----|---------------|-------------|---------|--------------------|--------------|----|------|------|------|------|----|
| 127 | <i>MYBPC3</i> | Ben         | Ben     | chr11:47371414G>A  | p.Val189Ile  | 67 | 0.8  | 5.84 | 4.54 | 0.33 | 1  |
| 128 | <i>MYH7</i>   | No call     | Path    | chr14:23883284C>T  | p.Arg1863Trp | 68 | 1.25 | 5.05 | 4.61 | 0.33 | 3  |
| 129 | <i>ACTC1</i>  | No call     | VUS     | chr15:35086991A>T  | p.Thr7Ser    | 62 | 1.07 | 4.4  | 3.97 | 0.36 | 3  |
| 130 | <i>MYBPC3</i> | Lik Ben     | VUS     | chr11:47359047G>A  | p.Ala833Thr  | 68 | 1.05 | 5.97 | 4.25 | 0.35 | 2  |
| 131 | <i>MYH7</i>   | No call     | Path    | chr14:23886083G>T  | p.Glu1546Asp | 54 | 0.85 | 4.6  | 3.9  | 0.28 | 1  |
| 132 | <i>MYBPC3</i> | VUS         | VUS     | chr11:47353755C>T  | p.Arg1228Cys | 53 | 0.8  | 5.3  | 4.1  | 0.4  | 2  |
| 133 | <i>MYL3</i>   | No call     | VUS     | chr3:46899876A>C   | p.Glu186Ala  | 65 | 1.1  | 5    | 4.25 | 0.4  | 4  |
| 134 | <i>MYBPC3</i> | No call     | VUS     | chr11:47354130G>A  | p.Arg1205Gln | 66 | 0.8  | 4.66 | 3.69 | 0.37 | 0  |
| 135 | <i>MYBPC3</i> | VUS         | Ben     | chr11:47361309C>T  | p.Arg654Cys  | 44 | 1    | 4.5  | 3.6  | 0.33 | 0  |
| 136 | <i>MYH7</i>   | No call     | Path    | chr14:23883232G>A  | p.Arg1880His | 52 | 1.1  | 5.98 | 3.7  | 0.43 | 1  |
| 137 | <i>MYBPC3</i> | Lik Ben     | VUS     | chr11:47359047G>A  | p.Ala833Thr  | 47 | 0.9  | 5.4  | 4.24 | 0.22 | 0  |
| 138 | <i>MYBPC3</i> | Ben         | VUS     | chr11:47367871G>A  | p.Arg326Gln  | 63 | 1.08 | 5.15 | 4.67 | 0.34 | 5  |
| 139 | <i>MYH7</i>   | No call     | No call | chr14:23889445A>C  | SPLICE SITE  | 53 | 0.8  | 4.64 | 3.31 | 0.3  | 0  |
| 140 | <i>MYH7</i>   | No call     | Path    | chr14:23887512G>A  | ACCEPTOR     | 58 | 0.71 | 4.9  | 3.79 | 0.43 | 0  |
| 141 | <i>TPM1</i>   | No call     | Path    | chr15:63354775C>T  | p.Arg1359His | 65 | 0.84 | 4.52 | 3.02 | 0.37 | 2  |
| 142 | <i>MYBPC3</i> | Ben         | Ben     | chr11:47371414G>A  | p.Ala235Thr  | 75 | 1.26 | 4.96 | 5.04 | 0.38 | 3  |
| 143 | <i>MYH7</i>   | VUS         | Ben     | chr14:23885257G>A  | p.Val189Ile  | 76 | 0.96 | 5.82 | 5.03 | 0.31 | 3  |
| 144 | <i>MYBPC3</i> | Path        | No call | chr11:47373058A>G  | p.Ala1637Thr | 75 | 1.02 | 4.9  | 4.45 | 0.36 | 4  |
| 145 | <i>TNNI3</i>  | Path        | VUS     | chr19:55665462G>A  | SPLICE SITE  | 52 | NA   | NA   | 4.1  | NA   | NA |
| 146 | <i>MYL3</i>   | VUS         | VUS     | chr3:46900980G>A   | ACCEPTOR     | 67 | 1.38 | 4.49 | 4.32 | 0.51 | 3  |
| 147 | <i>MYH7</i>   | VUS         | Ben     | chr14:23887536C>T  | p.Val156Met  | 43 | 0.96 | 5.45 | 4.54 | 0.34 | 1  |
| 148 | <i>MYBPC3</i> | No call     | VUS     | chr11:47361250C>G  | p.Thr1351Met | 57 | 1.15 | 4.9  | 3.93 | 0.47 | 2  |
| 149 | <i>MYH7</i>   | No call     | VUS     | chr14:23893273T>C  | p.Ile673Met  | 55 | 0.88 | 4.77 | 3.7  | 0.32 | 0  |
| 150 | <i>MYH7</i>   | Likely Path | Path    | chr14:23884476G>A  | p.Met922Thr  | 54 | 1.05 | 4.71 | 4.34 | 0.31 | 1  |
| 151 | <i>MYBPC3</i> | No call     | Ben     | chr11:47355128C>T  | p.Ala1763Thr | 42 | 0.87 | 4.63 | 4.25 | 0.32 | 2  |
| 152 | <i>MYBPC3</i> | VUS         | VUS     | chr11:47353755C>T  | p.Thr1057Met | 46 | 0.9  | 4.4  | 3    | 0.39 | 1  |
| 153 | <i>MYH7</i>   | No call     | Ben     | chr14:23896910T>C  | p.Arg1228Cys | 73 | 1.01 | 5.32 | 3.78 | 0.26 | 2  |
| 154 | <i>MYL2</i>   | Likely Path | Path    | chr12:111353547C>A | p.Ile591Thr  | 63 | 1.19 | 4.75 | 4.28 | 0.38 | 1  |
| 155 | <i>MYBPC3</i> | VUS         | VUS     | chr11:47362772A>G  | p.Asn47Lys   | 53 | 0.84 | 4.88 | 3.16 | 0.34 | 0  |
| 156 | <i>MYBPC3</i> | VUS         | Ben     | chr11:47356628C>G  | p.Asp605Gly  | 65 | 0.73 | 4.66 | 3.5  | 0.34 | 1  |
| 157 | <i>MYH7</i>   | VUS         | Path    | chr14:23892910T>C  | p.Thr957Ser  | 69 | 1.06 | 4.21 | 3.91 | 0.41 | 2  |
| 158 | <i>TNNI3</i>  | No call     | No call | chr19:55666189C>T  | p.Met982Thr  | 71 | 1    | 4.8  | 3.79 | 0.38 | 1  |
|     |               |             |         |                    | p.Arg98*     |    |      |      |      |      |    |

ID, participants with sarcomere variants were numbered consecutively. LMM, variant call using the Laboratory for Molecular Medicine database. ppHCM, variant call using the polyphen HCM algorithm. Prot, protein change. LVWT, left ventricular wall thickness (in cm). LVDD, left ventricular diastolic diameter (in cm). LAD, left atrial diameter (in cm). FS, Fractional shortening. NA indicates that the data was not available for our analysis. N Phys. Risk Factors, the number of physiologic risk factors an individual has including hyperlipidemia, hypertension, obesity and diabetes.

**Table S3. Rare variants (MAF<1%) in eight sarcomere genes identified in JHS participants and their echocardiography data and number of physiologic risk factors**

| ID | GENE   | LMM     | ppHCM   | Call              | Prot         | AGE | LVWT | LVDD | LAD  | FS   | N Phys. Risk Factors |
|----|--------|---------|---------|-------------------|--------------|-----|------|------|------|------|----------------------|
| 1  | MYBPC3 | No call | VUS     | chr11:47360202G>A | p.Arg726His  | 67  | 0.83 | 4.93 | 3.56 | 0.42 | 3                    |
| 1  | MYBPC3 | Ben     | Ben     | chr11:47355192C>T | p.Arg1036Cys | 67  | 0.83 | 4.93 | 3.56 | 0.42 | 3                    |
| 2  | MYBPC3 | Ben     | Ben     | chr11:47371333G>A | p.Ala216Thr  | 62  | 0.7  | 4.8  | 3.1  | 0.33 | 2                    |
| 2  | MYH7   | No call | VUS     | chr14:23893999C>A | p.Asp886Glu  | 62  | 0.7  | 4.8  | 3.1  | 0.33 | 2                    |
| 3  | MYBPC3 | VUS     | VUS     | chr11:47369411G>A | p.Arg273His  | 65  | 1    | 5.1  | 3.8  | 0.45 | 0                    |
| 3  | MYH7   | Ben     | Ben     | chr14:23886409C>G | p.Ser1491Cys | 65  | 1    | 5.1  | 3.8  | 0.45 | 0                    |
| 4  | MYBPC3 | No call | Ben     | chr11:47369995A>T | p.Asn251Ile  | 61  | 0.95 | 5    | 3.36 | 0.31 | 0                    |
| 5  | MYBPC3 | Ben     | VUS     | chr11:47355294C>T | p.Arg1002Trp | 65  | 1.1  | 5.37 | 3.49 | 0.5  | 0                    |
| 6  | MYH7   | No call | Path    | chr14:23893251G>C | p.Glu929Asp  | 59  | 1.13 | 5.42 | 3.69 | 0.32 | 3                    |
| 7  | MYBPC3 | VUS     | VUS     | chr11:47364209A>G | p.Asn515Ser  | 62  | 0.98 | 4.21 | 3.65 | 0.37 | 2                    |
| 8  | MYBPC3 | VUS     | VUS     | chr11:47354463T>C | p.Ile1131Thr | 63  | 0.96 | 4.37 | 3.29 | 0.41 | 4                    |
| 9  | MYBPC3 | VUS     | VUS     | chr11:47355553C>T | p.Arg972Trp  | 61  | 0.92 | 5.01 | 3.77 | 0.4  | 2                    |
| 10 | MYBPC3 | Ben     | Ben     | chr11:47357479G>A | p.Val896Met  | 69  | 0.68 | 4.78 | 3.78 | 0.4  | 0                    |
| 11 | MYBPC3 | Ben     | VUS     | chr11:47364234G>A | p.Gly507Arg  | 74  | 1    | 4    | 2.5  | 0.43 | 1                    |
| 12 | MYBPC3 | Ben     | VUS     | chr11:47355294C>T | p.Arg1002Trp | 72  | 1    | 4.2  | 3.5  | 0.31 | 0                    |
| 12 | MYBPC3 | No call | Ben     | chr11:47356682G>C | p.Arg939Pro  | 72  | 1    | 4.2  | 3.5  | 0.31 | 0                    |
| 13 | MYH7   | Ben     | Ben     | chr14:23886409C>G | p.Ser1491Cys | 75  | 1.1  | 4.7  | 2.6  | 0.47 | 2                    |
| 14 | MYBPC3 | Ben     | Ben     | chr11:47355192C>T | p.Arg1036Cys | 61  | NA   | NA   | NA   | NA   | 1                    |
| 15 | MYH7   | VUS     | Path    | chr14:23892910T>C | p.Met982Thr  | 68  | 0.9  | 4.6  | 3.6  | 0.37 | 0                    |
| 15 | MYBPC3 | No call | VUS     | chr11:47355528G>A | p.Arg980His  | 68  | 0.9  | 4.6  | 3.6  | 0.37 | 0                    |
| 16 | TPM1   | No call | VUS     | chr15:63356304G>A | p.Glu272Lys  | 68  | 1.3  | 5    | 3.8  | 0.3  | 1                    |
| 17 | MYBPC3 | No call | Path    | chr11:47371406G>T | p.Trp191Cys  | 71  | 0.87 | 5.55 | 4.55 | 0.34 | 2                    |
| 18 | TPM1   | No call | Path    | chr15:63356287A>G | p.Lys266Arg  | 76  | 1.1  | 5.1  | 3.2  | 0.25 | 3                    |
| 18 | MYL3   | No call | NA      | chr3:46904834C>T  | p.Ala16Val   | 76  | 1.1  | 5.1  | 3.2  | 0.25 | 3                    |
| 19 | MYBPC3 | No call | VUS     | chr11:47365113G>A | p.Val385Met  | 64  | 0.9  | 4.56 | 3.59 | 0.38 | 1                    |
| 20 | MYH7   | Ben     | Ben     | chr14:23886409C>G | p.Ser1491Cys | 67  | 0.97 | 4.62 | 3.63 | 0.41 | 3                    |
| 21 | MYBPC3 | VUS     | VUS     | chr11:47364209A>G | p.Asn515Ser  | 74  | 1.1  | 5.5  | 4.3  | 0.4  | 2                    |
| 22 | MYBPC3 | No call | VUS     | chr11:47360202G>A | p.Arg726His  | 68  | 1    | 4.9  | 3.2  | 0.31 | 1                    |
| 22 | MYBPC3 | Ben     | Ben     | chr11:47355192C>T | p.Arg1036Cys | 68  | 1    | 4.9  | 3.2  | 0.31 | 1                    |
| 23 | MYBPC3 | Ben     | VUS     | chr11:47355294C>T | p.Arg1002Trp | 61  | 0.9  | 5.9  | 4.1  | 0.41 | 4                    |
| 24 | MYBPC3 | No call | Ben     | chr11:47356733G>A | p.Gly922Glu  | 69  | 1.3  | 5.1  | 4.04 | 0.44 | 3                    |
| 25 | MYBPC3 | VUS     | Ben     | chr11:47364189G>A | p.Ala522Thr  | 64  | 0.95 | 4.73 | 3.69 | 0.46 | 4                    |
| 26 | MYBPC3 | Ben     | VUS     | chr11:47364234G>A | p.Gly507Arg  | 64  | 1    | 4.9  | 3.4  | 0.47 | 3                    |
| 27 | MYBPC3 | Ben     | VUS     | chr11:47355294C>T | p.Arg1002Trp | 74  | 1.1  | 5.2  | 4    | 0.38 | 1                    |
| 28 | TPM1   | No call | Path    | chr15:63356287A>G | p.Lys266Arg  | 64  | NA   | NA   | NA   | NA   | 0                    |
| 29 | MYBPC3 | VUS     | Ben     | chr11:47364189G>A | p.Ala522Thr  | 66  | 1.3  | 4.5  | 3.5  | 0.4  | 3                    |
| 30 | MYH7   | VUS     | Ben     | chr14:23885257G>A | p.Ala1637Thr | 69  | 1.06 | 4.94 | 4.15 | 0.39 | 2                    |
| 31 | MYBPC3 | VUS     | Ben     | chr11:47364189G>A | p.Ala522Thr  | 71  | 1.2  | 4.3  | 3.9  | 0.3  | 3                    |
| 32 | MYBPC3 | VUS     | VUS     | chr11:47364637C>T | p.Ala429Val  | 63  | 1.25 | 4.83 | 4.03 | 0.45 | 4                    |
| 33 | MYBPC3 | VUS     | Ben     | chr11:47364189G>A | p.Ala522Thr  | 58  | 1.2  | 5.2  | 3.1  | 0.4  | 0                    |
| 34 | MYBPC3 | VUS     | Ben     | chr11:47364189G>A | p.Ala522Thr  | 66  | 1.4  | 5.3  | 3.2  | 0.34 | 2                    |
| 35 | MYBPC3 | No call | VUS     | chr11:47353755C>T | p.Arg1228Cys | 58  | 0.99 | 4.9  | 3.33 | 0.47 | 3                    |
| 36 | MYH7   | Ben     | Ben     | chr14:23886409C>G | p.Ser1491Cys | 74  | 0.72 | 4.26 | 3.54 | 0.46 | 3                    |
| 37 | MYBPC3 | Ben     | VUS     | chr11:47364234G>A | p.Gly507Arg  | 61  | 0.77 | 4.83 | 3.09 | 0.51 | 1                    |
| 38 | MYBPC3 | No call | Ben     | chr11:47356638G>A | p.Ala954Thr  | 58  | 1    | 5.4  | 3.5  | 0.46 | 0                    |
| 39 | MYBPC3 | Ben     | VUS     | chr11:47354442G>A | p.Arg1138His | 62  | 0.79 | 4.93 | 3.63 | 0.45 | 4                    |
| 40 | MYBPC3 | Ben     | VUS     | chr11:47364234G>A | p.Gly507Arg  | 67  | 1    | 4.87 | 3.63 | 0.41 | 1                    |
| 41 | MYBPC3 | Ben     | VUS     | chr11:47363699C>A | p.Leu545Met  | 69  | 0.85 | 4.32 | 3.52 | 0.43 | 2                    |
| 41 | MYBPC3 | Ben     | VUS     | chr11:47364234G>A | p.Gly507Arg  | 69  | 0.85 | 4.32 | 3.52 | 0.43 | 2                    |
| 42 | MYBPC3 | No call | VUS     | chr11:47353755C>T | p.Arg1228Cys | 71  | 0.95 | 4.45 | 2.74 | 0.45 | 3                    |
| 43 | MYBPC3 | No call | VUS     | chr11:47354846G>T | p.Ala1077Ser | 59  | 0.89 | 3.89 | 3.16 | 0.44 | 2                    |
| 44 | MYBPC3 | VUS     | VUS     | chr11:47355553C>T | p.Arg972Trp  | 74  | 1.07 | 4.75 | NA   | 0.36 | 5                    |
| 45 | MYL3   | No call | No call | chr3:46901035     | FRAME_SHIFT  | 68  | 1.15 | 4.31 | 3.77 | 0.47 | 4                    |

|     |               |             |         |                    |              |    |      |      |      |      |   |
|-----|---------------|-------------|---------|--------------------|--------------|----|------|------|------|------|---|
| 46  | <i>MYBPC3</i> | No call     | Ben     | chr11:47372975C>A  | p.Ala36Glu   | 60 | NA   | NA   | NA   | NA   | 3 |
| 47  | <i>MYBPC3</i> | No call     | VUS     | chr11:47371422C>T  | p.Pro186Leu  | 67 | 1.06 | 4.46 | 4.03 | 0.41 | 2 |
| 48  | <i>MYBPC3</i> | Ben         | VUS     | chr11:47364234G>A  | p.Gly507Arg  | 60 | 1.16 | 5.21 | 3.34 | 0.46 | 3 |
| 49  | <i>MYBPC3</i> | VUS         | Ben     | chr11:47364189G>A  | p.Ala522Thr  | 62 | 0.93 | 4.98 | 3.71 | 0.45 | 2 |
| 50  | <i>MYBPC3</i> | Ben         | Ben     | chr11:47355192C>T  | p.Arg1036Cys | 63 | 1.05 | 5.47 | 3.54 | 0.42 | 3 |
| 51  | <i>MYBPC3</i> | VUS         | VUS     | chr11:47355553C>T  | p.Arg972Trp  | 61 | 1.11 | 4.65 | 3.65 | 0.46 | 2 |
| 52  | <i>TNNT2</i>  | Likely Path | Path    | chr1:201328373C>T  | p.Arg278Cys  | 64 | 0.96 | 4.6  | 3.89 | 0.5  | 2 |
| 53  | <i>MYH7</i>   | No call     | Ben     | chr14:23897768G>A  | p.Glu507Lys  | 69 | 0.88 | 5.31 | 3.93 | 0.28 | 1 |
| 54  | <i>MYBPC3</i> | VUS         | VUS     | chr11:47354463T>C  | p.Ile1131Thr | 66 | 0.95 | 4.63 | 4.07 | 0.36 | 0 |
| 55  | <i>MYBPC3</i> | Ben         | Ben     | chr11:47355192C>T  | p.Arg1036Cys | 60 | 0.78 | 4.34 | 3.54 | 0.38 | 1 |
| 56  | <i>MYH7</i>   | Ben         | Ben     | chr14:23886409C>G  | p.Ser1491Cys | 65 | 0.87 | 5.32 | 3.96 | 0.39 | 1 |
| 57  | <i>MYBPC3</i> | VUS         | VUS     | chr11:47355553C>T  | p.Arg972Trp  | 75 | 0.74 | 5.85 | 4.23 | 0.38 | 2 |
| 58  | <i>MYBPC3</i> | VUS         | VUS     | chr11:47364637C>T  | p.Ala429Val  | 67 | 0.94 | 4.81 | 3.27 | 0.37 | 2 |
| 59  | <i>MYBPC3</i> | Ben         | VUS     | chr11:47355294C>T  | p.Arg1002Trp | 74 | 1.06 | 4.61 | 4.45 | 0.33 | 2 |
| 60  | <i>MYBPC3</i> | Ben         | VUS     | chr11:47364234G>A  | p.Gly507Arg  | 62 | 0.97 | 4.54 | 3.34 | 0.48 | 1 |
| 61  | <i>MYBPC3</i> | Ben         | VUS     | chr11:47364234G>A  | p.Gly507Arg  | 64 | 0.98 | 6.28 | 4.3  | 0.13 | 2 |
| 62  | <i>MYBPC3</i> | VUS         | VUS     | chr11:47355553C>T  | p.Arg972Trp  | 68 | 0.84 | 5.05 | 3.56 | 0.4  | 3 |
| 63  | <i>MYBPC3</i> | Ben         | Ben     | chr11:47371414G>A  | p.Val189Ile  | 76 | 0.83 | 4.33 | 3.27 | 0.45 | 1 |
| 64  | <i>MYBPC3</i> | VUS         | VUS     | chr11:47355553C>T  | p.Arg972Trp  | 73 | 0.83 | 5.19 | 3.9  | 0.38 | 2 |
| 65  | <i>MYBPC3</i> | Ben         | Ben     | chr11:47355192C>T  | p.Arg1036Cys | 71 | NA   | NA   | NA   | NA   | 0 |
| 66  | <i>MYBPC3</i> | No call     | Ben     | chr11:47353650C>T  | p.Arg1263Trp | 62 | 0.98 | 4.32 | 2.68 | 0.48 | 1 |
| 67  | <i>MYBPC3</i> | No call     | Ben     | chr11:47364188C>T  | p.Ala522Val  | 61 | 1.06 | 4.94 | 2.86 | 0.43 | 2 |
| 68  | <i>MYH7</i>   | VUS         | No call | chr14:23902782C>T  | p.Arg54*     | 67 | 0.78 | 4.53 | 3.18 | 0.41 | 1 |
| 69  | <i>MYBPC3</i> | VUS         | Ben     | chr11:47360169C>T  | p.Thr737Met  | 67 | 0.96 | 3.94 | 3.33 | 0.42 | 2 |
| 70  | <i>MYH7</i>   | No call     | Path    | chr14:23902851T>C  | p.Phe31Leu   | 79 | 0.71 | 4.68 | 3.38 | 0.42 | 1 |
| 71  | <i>MYBPC3</i> | VUS         | VUS     | chr11:47355553C>T  | p.Arg972Trp  | 62 | 0.93 | 4.94 | 3.81 | 0.41 | 3 |
| 72  | <i>MYBPC3</i> | Ben         | Ben     | chr11:47357479G>A  | p.Val896Met  | 74 | 0.89 | 4.6  | 3.33 | 0.29 | 0 |
| 73  | <i>MYBPC3</i> | Ben         | VUS     | chr11:47355294C>T  | p.Arg1002Trp | 66 | 0.92 | 4.65 | 3.29 | 0.43 | 1 |
| 74  | <i>TNNT2</i>  | No call     | Path    | chr1:201333428G>A  | p.Ala153Thr  | 66 | 0.84 | 4.65 | 2.85 | 0.24 | 1 |
| 75  | <i>MYH7</i>   | VUS         | Path    | chr14:23892910T>C  | p.Met982Thr  | 61 | 0.83 | 4.46 | 2.98 | 0.34 | 3 |
| 76  | <i>MYBPC3</i> | VUS         | VUS     | chr11:47355553C>T  | p.Arg972Trp  | 57 | 0.81 | 4.93 | 3.65 | 0.38 | 5 |
| 77  | <i>MYH7</i>   | Ben         | Ben     | chr14:23886409C>G  | p.Ser1491Cys | 66 | 0.88 | 5.03 | 3.85 | 0.43 | 0 |
| 78  | <i>MYBPC3</i> | Ben         | VUS     | chr11:47355294C>T  | p.Arg1002Trp | 75 | 0.85 | 7.21 | 4.67 | 0.1  | 1 |
| 79  | <i>MYBPC3</i> | Ben         | VUS     | chr11:47364677G>A  | p.Gly416Ser  | 68 | 0.73 | 4.89 | 3.89 | 0.42 | 0 |
| 80  | <i>MYBPC3</i> | Ben         | Ben     | chr11:47371333G>A  | p.Ala216Thr  | 58 | 0.93 | 5.12 | 3.83 | 0.4  | 1 |
| 81  | <i>MYBPC3</i> | VUS         | Ben     | chr11:47364189G>A  | p.Ala522Thr  | 57 | 1.4  | 5.4  | 3.8  | 0.41 | 2 |
| 82  | <i>MYBPC3</i> | VUS         | VUS     | chr11:47364637C>T  | p.Ala429Val  | 53 | 1.3  | 5.6  | 3.8  | 0.52 | 2 |
| 83  | <i>MYBPC3</i> | VUS         | Ben     | chr11:47364189G>A  | p.Ala522Thr  | 43 | 1.2  | 4.3  | 2.7  | 0.3  | 1 |
| 84  | <i>MYH7</i>   | VUS         | Path    | chr14:23892910T>C  | p.Met982Thr  | 51 | 0.9  | 5.4  | 3.6  | 0.3  | 1 |
| 84  | <i>MYBPC3</i> | Ben         | VUS     | chr11:47364234G>A  | p.Gly507Arg  | 51 | 0.9  | 5.4  | 3.6  | 0.3  | 1 |
| 85  | <i>MYBPC3</i> | No call     | VUS     | chr11:47364393C>T  | p.Ala482Val  | 44 | 1    | 5.2  | 3.9  | 0.37 | 2 |
| 86  | <i>MYBPC3</i> | No call     | VUS     | chr11:47355201C>T  | p.Arg1033Trp | 50 | 0.8  | 5.2  | 3.7  | 0.52 | 1 |
| 87  | <i>MYBPC3</i> | Ben         | VUS     | chr11:47355475C>G  | p.Gln998Glu  | 51 | 1.4  | 4.2  | 3.7  | 0.57 | 2 |
| 88  | <i>MYBPC3</i> | VUS         | VUS     | chr11:47364209A>G  | p.Asn515Ser  | 57 | 0.92 | 4.62 | 3.21 | 0.44 | 0 |
| 89  | <i>MYH7</i>   | VUS         | Ben     | chr14:23885257G>A  | p.Ala1637Thr | 38 | 0.9  | 5.9  | 3.5  | 0.32 | 0 |
| 90  | <i>MYBPC3</i> | Ben         | VUS     | chr11:47355294C>T  | p.Arg1002Trp | 40 | 0.8  | 4.2  | 3.2  | 0.38 | 0 |
| 91  | <i>TPM1</i>   | No call     | VUS     | chr15:63356304G>A  | p.Glu272Lys  | 48 | 0.81 | 5.03 | 2.82 | 0.27 | 0 |
| 92  | <i>MYBPC3</i> | Ben         | Ben     | chr11:47371333G>A  | p.Ala216Thr  | 55 | 1.1  | 4.2  | 3.1  | 0.29 | 0 |
| 93  | <i>MYBPC3</i> | No call     | VUS     | chr11:47353755C>T  | p.Arg1228Cys | 76 | 1.2  | 3.9  | 2.5  | 0.41 | 1 |
| 94  | <i>MYH7</i>   | Ben         | Ben     | chr14:23886409C>G  | p.Ser1491Cys | 38 | 1    | 4.3  | 2.7  | 0.37 | 2 |
| 95  | <i>MYBPC3</i> | Ben         | VUS     | chr11:47355294C>T  | p.Arg1002Trp | 45 | 1.03 | 5.23 | 2.53 | 0.44 | 1 |
| 96  | <i>MYBPC3</i> | Ben         | VUS     | chr11:47364234G>A  | p.Gly507Arg  | 51 | 1.3  | 4.4  | 3    | 0.39 | 2 |
| 97  | <i>MYBPC3</i> | Ben         | VUS     | chr11:47364234G>A  | p.Gly507Arg  | 52 | 1.1  | 5.2  | 3.7  | 0.4  | 3 |
| 98  | <i>MYBPC3</i> | Ben         | VUS     | chr11:47355294C>T  | p.Arg1002Trp | 40 | 1.2  | 4.7  | 3.5  | 0.45 | 2 |
| 99  | <i>MYBPC3</i> | No call     | Ben     | chr11:47372975C>A  | p.Ala36Glu   | 51 | 0.96 | 5.18 | 3.62 | 0.24 | 0 |
| 100 | <i>MYBPC3</i> | No call     | VUS     | chr11:47371591G>A  | p.Arg160Gln  | 74 | 0.89 | 6.13 | 3.86 | 0.37 | 3 |
| 101 | <i>MYL3</i>   | No call     | NA      | chr3:46904845T>G   | p.Asp12Glu   | 45 | 0.93 | 4.38 | 3.51 | 0.41 | 2 |
| 102 | <i>MYBPC3</i> | VUS         | VUS     | chr11:47355553C>T  | p.Arg972Trp  | 51 | 1    | 4.38 | 3.54 | 0.49 | 3 |
| 102 | <i>MYH7</i>   | Ben         | Ben     | chr14:23886409C>G  | p.Ser1491Cys | 51 | 1    | 4.38 | 3.54 | 0.49 | 3 |
| 103 | <i>MYBPC3</i> | Ben         | VUS     | chr11:47364234G>A  | p.Gly507Arg  | 45 | 0.92 | 5.07 | 3.19 | 0.4  | 1 |
| 104 | <i>MYL2</i>   | VUS         | VUS     | chr12:111353525G>T | p.Ala55Ser   | 53 | 0.87 | 5.1  | 2.89 | 0.49 | 2 |

|     |               |             |         |                    |              |    |      |      |      |      |   |
|-----|---------------|-------------|---------|--------------------|--------------|----|------|------|------|------|---|
| 105 | <i>MYH7</i>   | Ben         | Ben     | chr14:23886409C>G  | p.Ser1491Cys | 71 | 0.8  | 4.9  | 3.4  | 0.43 | 0 |
| 105 | <i>MYBPC3</i> | Ben         | Ben     | chr11:47371333G>A  | p.Ala216Thr  | 71 | 0.8  | 4.9  | 3.4  | 0.43 | 0 |
| 106 | <i>MYBPC3</i> | No call     | Ben     | chr11:47355246G>C  | p.Glu1018Gln | 47 | 0.98 | 4.92 | 3.21 | 0.37 | 0 |
| 107 | <i>MYBPC3</i> | No call     | Ben     | chr11:47371604C>G  | p.Leu156Val  | 38 | 0.96 | 5.34 | 4.12 | 0.34 | 0 |
| 108 | <i>MYBPC3</i> | No call     | VUS     | chr11:47355528G>A  | p.Arg980His  | 54 | 0.8  | 4.76 | 3.09 | 0.33 | 0 |
| 109 | <i>MYBPC3</i> | VUS         | VUS     | chr11:47364602G>A  | p.Glu441Lys  | 48 | 1.08 | 5.06 | 4.04 | 0.42 | 2 |
| 110 | <i>MYBPC3</i> | VUS         | VUS     | chr11:47364637C>T  | p.Ala429Val  | 49 | 0.96 | 4.23 | 2.99 | 0.4  | 1 |
| 111 | <i>MYBPC3</i> | Ben         | VUS     | chr11:47355294C>T  | p.Arg1002Trp | 73 | 1.1  | 5.04 | 3.9  | 0.39 | 2 |
| 112 | <i>MYBPC3</i> | No call     | Ben     | chr11:47371381A>G  | p.Ser200Gly  | 52 | NA   | NA   | NA   | NA   | 2 |
| 113 | <i>MYH7</i>   | No call     | Ben     | chr14:23884982C>G  | p.Ile1671Met | 37 | 0.87 | 4.62 | 3.97 | 0.5  | 1 |
| 114 | <i>MYBPC3</i> | Likely Path | VUS     | chr11:47361266G>A  | p.Arg668His  | 56 | 0.83 | 4.76 | 3.03 | 0.3  | 0 |
| 115 | <i>MYBPC3</i> | VUS         | VUS     | chr11:47355234C>T  | p.Arg1022Cys | 59 | 0.94 | 4.83 | 3.71 | 0.38 | 3 |
| 116 | <i>MYBPC3</i> | Ben         | VUS     | chr11:47355294C>T  | p.Arg1002Trp | 70 | NA   | NA   | 3.35 | NA   | 2 |
| 117 | <i>MYBPC3</i> | Ben         | Ben     | chr11:47355192C>T  | p.Arg1036Cys | 72 | 0.77 | 5.08 | 3.62 | 0.51 | 3 |
| 118 | <i>MYBPC3</i> | No call     | VUS     | chr11:47354392A>G  | p.Lys1155Glu | 50 | 0.87 | 4.75 | 2.67 | 0.36 | 0 |
| 119 | <i>MYL3</i>   | VUS         | NA      | chr3:46899903A>G   | p.Glu177Gly  | 56 | 1.1  | 4.71 | 3.75 | 0.45 | 2 |
| 120 | <i>MYH7</i>   | Ben         | Ben     | chr14:23886409C>G  | p.Ser1491Cys | 42 | 0.86 | 4.96 | 3.63 | 0.48 | 1 |
| 121 | <i>MYL3</i>   | No call     | NA      | chr3:46904811G>A   | p.Ala24Thr   | 52 | 0.78 | 4.3  | 3.13 | 0.38 | 0 |
| 122 | <i>MYBPC3</i> | Ben         | VUS     | chr11:47355294C>T  | p.Arg1002Trp | 42 | 1.13 | 5.45 | 4.1  | 0.3  | 1 |
| 123 | <i>MYBPC3</i> | Ben         | VUS     | chr11:47364677G>A  | p.Gly416Ser  | 69 | 1.05 | 4.93 | 3.66 | 0.35 | 2 |
| 124 | <i>MYBPC3</i> | Ben         | Ben     | chr11:47355192C>T  | p.Arg1036Cys | 70 | NA   | NA   | NA   | NA   | 1 |
| 125 | <i>MYBPC3</i> | Ben         | VUS     | chr11:47355294C>T  | p.Arg1002Trp | 51 | 1.28 | 4.48 | 3.72 | 0.36 | 2 |
| 126 | <i>MYBPC3</i> | Ben         | Ben     | chr11:47355192C>T  | p.Arg1036Cys | 49 | 0.95 | 4.36 | 3.66 | 0.44 | 1 |
| 126 | <i>MYBPC3</i> | VUS         | Ben     | chr11:47371609T>C  | p.Ile154Thr  | 49 | 0.95 | 4.36 | 3.66 | 0.44 | 1 |
| 127 | <i>MYBPC3</i> | VUS         | VUS     | chr11:47364637C>T  | p.Ala429Val  | 58 | 1.05 | 4.27 | 3.68 | 0.45 | 2 |
| 128 | <i>MYBPC3</i> | No call     | VUS     | chr11:47353429C>T  | p.Pro1273Leu | 53 | 0.81 | 5.4  | 3.08 | 0.39 | 0 |
| 129 | <i>MYBPC3</i> | No call     | VUS     | chr11:47364614G>A  | p.Val437Met  | 43 | 0.78 | 4.34 | 3.04 | 0.3  | 0 |
| 130 | <i>MYH7</i>   | Ben         | Ben     | chr14:23886409C>G  | p.Ser1491Cys | 61 | 0.85 | 5.1  | 3.73 | 0.41 | 0 |
| 131 | <i>MYL2</i>   | VUS         | Path    | chr12:111348923G>C | p.Lys153Asn  | 81 | 0.94 | 4.72 | 3.02 | 0.57 | 1 |
| 132 | <i>TNNT2</i>  | VUS         | Ben     | chr1:201335991A>G  | p.Met60Val   | 54 | 0.73 | 4.95 | 3.21 | 0.38 | 0 |
| 133 | <i>MYBPC3</i> | VUS         | Ben     | chr11:47364189G>A  | p.Ala522Thr  | 56 | 0.9  | 5.34 | 4.03 | 0.4  | 0 |
| 134 | <i>MYH7</i>   | No call     | Path    | chr14:23896983C>T  | p.Arg567Cys  | 47 | 0.68 | 4.31 | 2.89 | 0.4  | 1 |
| 135 | <i>MYBPC3</i> | Ben         | VUS     | chr11:47355294C>T  | p.Arg1002Trp | 63 | 0.96 | 4.73 | 2.97 | 0.46 | 1 |
| 136 | <i>MYBPC3</i> | No call     | VUS     | chr11:47353755C>T  | p.Arg1228Cys | 43 | 1.15 | 4.75 | 3.24 | 0.44 | 0 |
| 137 | <i>MYH7</i>   | Likely Path | Path    | chr14:23894051G>A  | p.Arg869His  | 44 | NA   | NA   | NA   | NA   | 0 |
| 138 | <i>MYH7</i>   | No call     | Path    | chr14:23892845C>G  | p.Gln1004Glu | 52 | 0.78 | 4.36 | 3.56 | 0.39 | 1 |
| 139 | <i>MYBPC3</i> | Ben         | VUS     | chr11:47364234G>A  | p.Gly507Arg  | 62 | 0.78 | 4.73 | 3.56 | 0.39 | 0 |
| 140 | <i>MYH7</i>   | No call     | Ben     | chr14:23896928T>C  | p.Ile585Thr  | 48 | NA   | NA   | NA   | NA   | 0 |
| 141 | <i>MYBPC3</i> | VUS         | Ben     | chr11:47364189G>A  | p.Ala522Thr  | 55 | 0.97 | 4.93 | 3.67 | 0.3  | 0 |
| 142 | <i>MYH7</i>   | Likely Path | Path    | chr14:23896955A>G  | p.His576Arg  | 61 | 0.7  | 4.98 | 3.74 | 0.42 | 0 |
| 143 | <i>MYBPC3</i> | Ben         | Ben     | chr11:47371333G>A  | p.Ala216Thr  | 49 | 0.93 | 4.93 | 4.14 | 0.41 | 1 |
| 144 | <i>MYBPC3</i> | Ben         | VUS     | chr11:47364234G>A  | p.Gly507Arg  | 54 | 1.01 | 4.54 | 3.34 | 0.49 | 0 |
| 144 | <i>MYBPC3</i> | Ben         | VUS     | chr11:47355294C>T  | p.Arg1002Trp | 54 | 1.01 | 4.54 | 3.34 | 0.49 | 0 |
| 145 | <i>MYBPC3</i> | Ben         | VUS     | chr11:47355294C>T  | p.Arg1002Trp | 56 | 0.83 | 5.27 | 4.15 | 0.35 | 0 |
| 146 | <i>MYBPC3</i> | VUS         | Ben     | chr11:47364189G>A  | p.Ala522Thr  | 53 | 1.05 | 4.86 | 2.89 | 0.33 | 0 |
| 147 | <i>MYBPC3</i> | VUS         | VUS     | chr11:47356616C>T  | p.Pro961Leu  | 42 | NA   | NA   | NA   | NA   | 1 |
| 148 | <i>MYBPC3</i> | Ben         | VUS     | chr11:47364234G>A  | p.Gly507Arg  | 51 | 0.9  | 5.13 | 3.58 | 0.46 | 1 |
| 149 | <i>MYBPC3</i> | Ben         | VUS     | chr11:47355294C>T  | p.Arg1002Trp | 57 | 0.95 | 4.65 | 3.25 | 0.45 | 0 |
| 150 | <i>MYL2</i>   | No call     | No call | chr12:111356937G>T | p.Glu22*     | 56 | 1.13 | 5.3  | 4.28 | 0.31 | 0 |
| 151 | <i>MYBPC3</i> | VUS         | VUS     | chr11:47356616C>T  | p.Pro961Leu  | 53 | 0.9  | 4.93 | 3.6  | 0.28 | 0 |
| 151 | <i>MYBPC3</i> | Ben         | VUS     | chr11:47364677G>A  | p.Gly416Ser  | 53 | 0.9  | 4.93 | 3.6  | 0.28 | 0 |
| 152 | <i>MYBPC3</i> | Ben         | Ben     | chr11:47355192C>T  | p.Arg1036Cys | 38 | 0.84 | 5.05 | 3.43 | 0.37 | 0 |
| 152 | <i>MYH7</i>   | VUS         | Path    | chr14:23885010G>A  | p.Arg1662His | 38 | 0.84 | 5.05 | 3.43 | 0.37 | 0 |
| 153 | <i>MYBPC3</i> | Ben         | VUS     | chr11:47359047G>A  | p.Ala833Thr  | 48 | NA   | NA   | NA   | NA   | 4 |
| 154 | <i>MYBPC3</i> | VUS         | Ben     | chr11:47364189G>A  | p.Ala522Thr  | 52 | 1.13 | 5.37 | 4.84 | 0.32 | 2 |
| 155 | <i>MYBPC3</i> | Ben         | Ben     | chr11:47355192C>T  | p.Arg1036Cys | 47 | 0.86 | 5.15 | 4.17 | 0.41 | 0 |
| 156 | <i>MYBPC3</i> | Ben         | Ben     | chr11:47357479G>A  | p.Val896Met  | 57 | 0.78 | 5    | 3.41 | 0.29 | 0 |
| 157 | <i>MYBPC3</i> | Ben         | VUS     | chr11:47364234G>A  | p.Gly507Arg  | 46 | 0.78 | 5.02 | 3.53 | 0.47 | 3 |
| 158 | <i>MYBPC3</i> | Ben         | VUS     | chr11:47355294C>T  | p.Arg1002Trp | 63 | 0.84 | 4.84 | 4.08 | 0.33 | 3 |
| 159 | <i>MYBPC3</i> | Ben         | VUS     | chr11:47364234G>A  | p.Gly507Arg  | 65 | 0.85 | 4.66 | 3.09 | 0.44 | 0 |
| 160 | <i>MYH7</i>   | VUS         | VUS     | chr14:23899810G>A  | p.Val320Met  | 63 | 1.02 | 4.54 | 3.69 | 0.43 | 0 |

|     |               |             |      |                   |              |    |      |      |      |      |   |
|-----|---------------|-------------|------|-------------------|--------------|----|------|------|------|------|---|
| 161 | <i>TNNT2</i>  | No call     | VUS  | chr1:201334778T>G | p.Val75Gly   | 36 | 0.79 | 4.96 | 3.45 | 0.43 | 0 |
| 162 | <i>TPM1</i>   | No call     | Path | chr15:63349257G>A | p.Arg105His  | 46 | 1.3  | 4.87 | 3.9  | 0.35 | 1 |
| 163 | <i>MYBPC3</i> | No call     | VUS  | chr11:47354440G>A | p.Val1139Ile | 38 | 1.05 | 4.61 | 3.95 | 0.32 | 2 |
| 164 | <i>MYH7</i>   | No call     | Path | chr14:23885422G>A | p.Glu1582Lys | 40 | 0.7  | 5.48 | 3.35 | 0.35 | 1 |
| 165 | <i>MYBPC3</i> | No call     | Ben  | chr11:47361206C>T | p.Thr688Met  | 50 | 1.36 | 4.83 | 3.68 | 0.51 | 0 |
| 166 | <i>MYH7</i>   | VUS         | Ben  | chr14:23884924G>A | p.Val1691Met | 65 | 0.93 | 4.97 | 3.93 | 0.37 | 2 |
| 166 | <i>MYBPC3</i> | Ben         | VUS  | chr11:47367871G>A | p.Arg326Gln  | 65 | 0.93 | 4.97 | 3.93 | 0.37 | 2 |
| 167 | <i>MYH7</i>   | No call     | Path | chr14:23893251G>C | p.Glu929Asp  | 41 | 0.97 | 4.37 | 3.09 | 0.38 | 0 |
| 168 | <i>MYH7</i>   | Likely Path | Path | chr14:23894051G>A | p.Arg869His  | 41 | 0.83 | 4.67 | 3.08 | 0.39 | 0 |
| 169 | <i>MYL3</i>   | Likely Path | NA   | chr3:46902303C>G  | p.Ala57Gly   | 81 | 0.87 | 4.94 | 3.08 | 0.47 | 0 |
| 170 | <i>MYBPC3</i> | Ben         | Ben  | chr11:47371333G>A | p.Ala216Thr  | 84 | 0.83 | 4.87 | NA   | 0.37 | 3 |
| 171 | <i>MYBPC3</i> | Ben         | Ben  | chr11:47371333G>A | p.Ala216Thr  | 46 | 1.14 | 4.69 | 3.23 | 0.41 | 1 |
| 172 | <i>MYBPC3</i> | VUS         | Ben  | chr11:47364189G>A | p.Ala522Thr  | 40 | 1.02 | 5.08 | 3.8  | 0.4  | 0 |
| 173 | <i>MYBPC3</i> | Ben         | VUS  | chr11:47355294C>T | p.Arg1002Trp | 43 | 0.78 | 4.19 | 3.23 | 0.41 | 1 |
| 174 | <i>MYH7</i>   | No call     | Path | chr14:23884344G>A | p.Gly1807Ser | 39 | 0.74 | 4.48 | 3.06 | 0.45 | 0 |
| 175 | <i>MYBPC3</i> | Ben         | VUS  | chr11:47367871G>A | p.Arg326Gln  | 50 | 0.74 | 5.27 | 3.38 | 0.39 | 0 |
| 176 | <i>MYBPC3</i> | No call     | VUS  | chr11:47360203C>T | p.Arg726Cys  | 51 | 0.85 | 5.53 | 3.83 | 0.39 | 0 |
| 177 | <i>MYBPC3</i> | VUS         | VUS  | chr11:47355553C>T | p.Arg972Trp  | 48 | 0.81 | 4.78 | 4.23 | 0.38 | 0 |
| 178 | <i>MYBPC3</i> | VUS         | VUS  | chr11:47358987G>A | p.Gly853Ser  | 41 | 0.74 | 4.28 | 3.06 | 0.4  | 0 |
| 179 | <i>MYBPC3</i> | No call     | Ben  | chr11:47361291G>T | p.Val660Leu  | 48 | 0.78 | 5.23 | 3.38 | 0.43 | 0 |
| 179 | <i>TNNT2</i>  | No call     | VUS  | chr1:201334327G>A | p.Asp125Asn  | 48 | 0.78 | 5.23 | 3.38 | 0.43 | 0 |
| 180 | <i>MYBPC3</i> | Ben         | VUS  | chr11:47364234G>A | p.Gly507Arg  | 47 | 0.83 | 4.93 | 3.23 | 0.3  | 0 |
| 181 | <i>MYBPC3</i> | No call     | Ben  | chr11:47369995A>T | p.Asn251Ile  | 38 | 0.65 | 4.5  | 2.53 | 0.34 | 0 |
| 182 | <i>MYBPC3</i> | No call     | VUS  | chr11:47359010G>A | p.Arg845His  | 58 | 0.86 | 5.47 | 3.73 | 0.35 | 2 |
| 183 | <i>MYBPC3</i> | Ben         | VUS  | chr11:47367871G>A | p.Arg326Gln  | 70 | 0.89 | 5.29 | 3.72 | 0.4  | 0 |
| 184 | <i>MYBPC3</i> | No call     | VUS  | chr11:47367892A>T | p.Glu319Val  | 53 | 0.74 | 4.93 | 2.94 | 0.38 | 2 |
| 185 | <i>MYBPC3</i> | VUS         | VUS  | chr11:47364637C>T | p.Ala429Val  | 76 | 0.73 | 5.04 | 4.07 | 0.34 | 1 |
| 186 | <i>MYBPC3</i> | VUS         | VUS  | chr11:47355553C>T | p.Arg972Trp  | 39 | 1    | 5.23 | 4.33 | 0.32 | 1 |
| 187 | <i>MYBPC3</i> | Ben         | VUS  | chr11:47364234G>A | p.Gly507Arg  | 66 | 1.23 | 4.55 | 4.36 | 0.46 | 1 |
| 188 | <i>MYH7</i>   | VUS         | Path | chr14:23892910T>C | p.Met982Thr  | 53 | 1.14 | 5.08 | 3.26 | 0.41 | 4 |
| 189 | <i>MYH7</i>   | No call     | Path | chr14:23891497T>G | p.Met1046Arg | 71 | 0.89 | 3.85 | 3.29 | 0.42 | 1 |
| 190 | <i>MYBPC3</i> | Ben         | VUS  | chr11:47364234G>A | p.Gly507Arg  | 44 | 0.84 | 4.87 | 3.56 | 0.41 | 0 |
| 191 | <i>MYBPC3</i> | Ben         | VUS  | chr11:47355294C>T | p.Arg1002Trp | 37 | 0.96 | 5.28 | 4.23 | 0.36 | 3 |
| 192 | <i>MYBPC3</i> | No call     | Ben  | chr11:47354857G>A | p.Arg1073Gln | 59 | 0.78 | 4.93 | 3.48 | 0.33 | 1 |
| 193 | <i>MYBPC3</i> | No call     | VUS  | chr11:47354440G>A | p.Val1139Ile | 49 | 1.28 | 3.96 | 3.89 | 0.37 | 2 |
| 194 | <i>TNNI3</i>  | No call     | VUS  | chr19:55666173G>A | p.Arg103His  | 51 | 1.35 | 4.15 | 3.38 | 0.35 | 0 |
| 195 | <i>MYBPC3</i> | VUS         | Ben  | chr11:47362731G>A | p.Glu619Lys  | 59 | 1.04 | 5.57 | 3.89 | 0.38 | 1 |
| 196 | <i>MYBPC3</i> | VUS         | VUS  | chr11:47355553C>T | p.Arg972Trp  | 37 | 1.35 | 4.2  | 4.16 | 0.27 | 0 |
| 197 | <i>MYBPC3</i> | Ben         | Ben  | chr11:47354209G>A | p.Glu1179Lys | 40 | 1.13 | 4.88 | 4.08 | 0.41 | 3 |
| 198 | <i>MYH7</i>   | VUS         | Path | chr14:23887443G>A | p.Arg1382Gln | 45 | 0.98 | 5.14 | 4.2  | 0.4  | 5 |
| 199 | <i>MYBPC3</i> | Ben         | VUS  | chr11:47355294C>T | p.Arg1002Trp | 76 | 0.87 | 5.08 | 3.78 | 0.34 | 3 |
| 200 | <i>MYBPC3</i> | Ben         | VUS  | chr11:47364234G>A | p.Gly507Arg  | 71 | 0.96 | 4.57 | 3.56 | 0.32 | 2 |
| 200 | <i>MYBPC3</i> | Ben         | VUS  | chr11:47363699C>A | p.Leu545Met  | 71 | 0.96 | 4.57 | 3.56 | 0.32 | 2 |
| 201 | <i>MYBPC3</i> | Ben         | VUS  | chr11:47364234G>A | p.Gly507Arg  | 64 | 0.9  | 5.36 | 4.23 | 0.47 | 1 |
| 202 | <i>MYBPC3</i> | Ben         | VUS  | chr11:47355294C>T | p.Arg1002Trp | 71 | 0.89 | 4.68 | 3.67 | 0.46 | 1 |
| 203 | <i>MYBPC3</i> | Ben         | VUS  | chr11:47355294C>T | p.Arg1002Trp | 50 | 0.95 | 5    | 3.69 | 0.39 | 1 |
| 204 | <i>MYBPC3</i> | Ben         | VUS  | chr11:47355294C>T | p.Arg1002Trp | 69 | 1    | 4.89 | 3.85 | 0.41 | 1 |
| 205 | <i>MYBPC3</i> | No call     | Ben  | chr11:47361206C>T | p.Thr688Met  | 81 | 1.05 | 4.89 | 3.56 | 0.29 | 2 |
| 206 | <i>MYBPC3</i> | Ben         | VUS  | chr11:47364234G>A | p.Gly507Arg  | 45 | 0.73 | 4.72 | 3.79 | 0.44 | 0 |
| 207 | <i>TPM1</i>   | VUS         | VUS  | chr15:63356319G>A | p.Ala277Thr  | 37 | 0.83 | 5.17 | 3.05 | 0.31 | 0 |
| 208 | <i>MYH7</i>   | No call     | Ben  | chr14:23902788G>A | p.Val52Met   | 45 | 0.74 | 5.06 | 3.46 | 0.34 | 2 |
| 209 | <i>MYH7</i>   | Ben         | Ben  | chr14:23886409C>G | p.Ser1491Cys | 56 | 1.2  | 4.37 | 2.85 | 0.47 | 0 |
| 210 | <i>MYBPC3</i> | VUS         | VUS  | chr11:47364637C>T | p.Ala429Val  | 54 | 0.82 | 4.25 | 3.08 | 0.4  | 0 |
| 211 | <i>TNNT2</i>  | Likely Path | Path | chr1:201328373C>T | p.Arg278Cys  | 79 | 1.09 | 4.68 | 3.74 | 0.39 | 0 |
| 211 | <i>MYBPC3</i> | Path        | VUS  | chr11:47364249C>T | p.Arg502Trp  | 79 | 1.09 | 4.68 | 3.74 | 0.39 | 0 |
| 212 | <i>MYBPC3</i> | No call     | VUS  | chr11:47353755C>T | p.Arg1228Cys | 53 | 0.78 | 4.22 | 3.01 | 0.42 | 0 |
| 213 | <i>MYBPC3</i> | Ben         | VUS  | chr11:47355294C>T | p.Arg1002Trp | 60 | 0.68 | 7.83 | 4.03 | 0.11 | 0 |
| 214 | <i>MYBPC3</i> | Ben         | VUS  | chr11:47364234G>A | p.Gly507Arg  | 48 | 0.86 | 4.98 | 4.29 | 0.37 | 0 |
| 215 | <i>MYBPC3</i> | No call     | Ben  | chr11:47361213G>C | p.Ala686Pro  | 57 | 0.84 | 4.48 | 3.68 | 0.44 | 3 |
| 216 | <i>MYH7</i>   | VUS         | Ben  | chr14:23885257G>A | p.Ala1637Thr | 57 | 0.98 | 4.77 | 3.63 | 0.45 | 3 |
| 217 | <i>MYBPC3</i> | Ben         | Ben  | chr11:47371333G>A | p.Ala216Thr  | 52 | 0.7  | 4.93 | 3.54 | 0.35 | 0 |

|     |               |             |      |                    |              |    |      |      |      |      |   |
|-----|---------------|-------------|------|--------------------|--------------|----|------|------|------|------|---|
| 218 | <i>MYBPC3</i> | VUS         | Ben  | chr11:47364189G>A  | p.Ala522Thr  | 46 | 0.74 | 4.63 | 3.38 | 0.38 | 1 |
| 219 | <i>MYBPC3</i> | No call     | Ben  | chr11:47372895C>T  | p.Arg63Trp   | 50 | 0.7  | 5.08 | 3.86 | 0.38 | 0 |
| 220 | <i>MYBPC3</i> | Ben         | VUS  | chr11:47355294C>T  | p.Arg1002Trp | 46 | 0.72 | 4.68 | 3.39 | 0.37 | 2 |
| 221 | <i>MYH7</i>   | VUS         | Ben  | chr14:23885257G>A  | p.Ala1637Thr | 45 | 1.08 | 4.95 | 3.99 | 0.34 | 1 |
| 222 | <i>MYBPC3</i> | Ben         | VUS  | chr11:47364234G>A  | p.Gly507Arg  | 59 | 1.19 | 5.63 | 4.46 | 0.43 | 1 |
| 223 | <i>MYBPC3</i> | Ben         | VUS  | chr11:47364234G>A  | p.Gly507Arg  | 48 | 1.12 | 4.61 | 3.8  | 0.47 | 3 |
| 224 | <i>MYL3</i>   | No call     | NA   | chr3:46902471T>C   | p.Phe46Leu   | 53 | 0.72 | 4.68 | 3.05 | 0.35 | 0 |
| 225 | <i>MYBPC3</i> | No call     | VUS  | chr11:47353755C>T  | p.Arg1228Cys | 40 | 0.81 | 5.19 | 3.55 | 0.37 | 2 |
| 226 | <i>MYBPC3</i> | Ben         | VUS  | chr11:47355294C>T  | p.Arg1002Trp | 54 | 0.86 | 4.89 | 3.99 | 0.41 | 0 |
| 227 | <i>MYBPC3</i> | Ben         | VUS  | chr11:47364234G>A  | p.Gly507Arg  | 67 | 0.95 | 4.75 | 3.78 | 0.33 | 1 |
| 228 | <i>MYH7</i>   | No call     | Ben  | chr14:23888736T>C  | p.Val1270Ala | 55 | 0.83 | 4.69 | 3.08 | 0.36 | 0 |
| 229 | <i>MYBPC3</i> | Ben         | Ben  | chr11:47355192C>T  | p.Arg1036Cys | 48 | 0.7  | 4.15 | 2.85 | 0.39 | 1 |
| 230 | <i>MYL2</i>   | No call     | VUS  | chr12:111348913C>T | p.His157Tyr  | 42 | 0.84 | 4.08 | 3.56 | 0.43 | 1 |
| 231 | <i>MYBPC3</i> | Ben         | VUS  | chr11:47355294C>T  | p.Arg1002Trp | 61 | 0.98 | 5.13 | 5.29 | 0.34 | 0 |
| 232 | <i>MYBPC3</i> | No call     | VUS  | chr11:47354403C>T  | p.Ala1151Val | 54 | 0.83 | 4.28 | 3.3  | 0.39 | 2 |
| 233 | <i>MYBPC3</i> | Ben         | VUS  | chr11:47355294C>T  | p.Arg1002Trp | 39 | 0.98 | 5.39 | 3.82 | 0.32 | 2 |
| 234 | <i>TNNI3</i>  | No call     | VUS  | chr19:55666173G>A  | p.Arg103His  | 51 | 0.96 | 4.58 | 3.94 | 0.38 | 0 |
| 235 | <i>MYBPC3</i> | No call     | VUS  | chr11:47355528G>A  | p.Arg980His  | 44 | 0.92 | 4.93 | 3.98 | 0.34 | 2 |
| 236 | <i>MYBPC3</i> | Ben         | VUS  | chr11:47367871G>A  | p.Arg326Gln  | 75 | 0.96 | 4.36 | 3.23 | 0.33 | 1 |
| 237 | <i>MYBPC3</i> | Ben         | Ben  | chr11:47355192C>T  | p.Arg1036Cys | 61 | 0.98 | 4.5  | 3.78 | 0.36 | 0 |
| 238 | <i>MYL3</i>   | Likely Path | NA   | chr3:46900980G>A   | p.Val156Met  | 44 | 0.94 | 4.65 | 3.74 | 0.34 | 3 |
| 239 | <i>TNNT2</i>  | No call     | Path | chr1:201342373A>C  | p.Ile4Leu    | 41 | 0.94 | 5.3  | 3.68 | 0.4  | 3 |
| 240 | <i>MYBPC3</i> | VUS         | VUS  | chr11:47355553C>T  | p.Arg972Trp  | 40 | 0.85 | 4.63 | 3.45 | 0.37 | 0 |
| 241 | <i>MYBPC3</i> | Ben         | VUS  | chr11:47355475C>G  | p.Gln998Glu  | 49 | 0.9  | 4.32 | 3.43 | 0.36 | 1 |
| 242 | <i>MYBPC3</i> | VUS         | Ben  | chr11:47364189G>A  | p.Ala522Thr  | 49 | 0.89 | 4.75 | 3.46 | 0.39 | 2 |
| 243 | <i>MYBPC3</i> | VUS         | Ben  | chr11:47364189G>A  | p.Ala522Thr  | 68 | 1.26 | 4.85 | 4.04 | 0.26 | 1 |
| 243 | <i>MYBPC3</i> | Ben         | VUS  | chr11:47364234G>A  | p.Gly507Arg  | 68 | 1.26 | 4.85 | 4.04 | 0.26 | 1 |
| 244 | <i>MYBPC3</i> | VUS         | Ben  | chr11:47364189G>A  | p.Ala522Thr  | 42 | 0.89 | 4.25 | 3.57 | 0.42 | 1 |

ID, participants with sarcomere variants were numbered consecutively. LMM, variant call using the Laboratory for Molecular Medicine database. ppHCM, variant call using the polyphen HCM algorithm. Prot, protein change. LVWT, left ventricular wall thickness (cm). LVDD, left ventricular diastolic diameter (cm). LAD, left atrial diameter (cm). FS, Fractional shortening. NA indicates that the data was not available for our analysis. N Phys. Risk Factors, the number of physiologic risk factors an individual has including hyperlipidemia, hypertension, obesity and diabetes.

**Table S4 Number of individuals with at least one variant as evaluated by two approaches**

| Framingham Heart Study Offspring Cohort |                         |       |        |       |     |       |                      |       |       |
|-----------------------------------------|-------------------------|-------|--------|-------|-----|-------|----------------------|-------|-------|
|                                         | Pathogenic <sup>a</sup> |       | Benign |       | VUS |       | No Call <sup>b</sup> |       | Total |
|                                         | LMM                     | ppHCM | LMM    | ppHCM | LMM | ppHCM | LMM                  | ppHCM |       |
| <i>MYBPC3</i>                           | 4                       | 1     | 33     | 45    | 37  | 44    | 18                   | 2     | 92    |
| <i>MYH7</i>                             | 2                       | 21    | 0      | 6     | 13  | 7     | 21                   | 2     | 36    |
| <i>MYL3</i>                             | 2                       | 0     | 0      | 0     | 7   | 12    | 3                    | 0     | 12    |
| <i>MYL2</i>                             | 4                       | 5     | 0      | 0     | 2   | 2     | 1                    | 0     | 7     |
| <i>TNNT2</i>                            | 1                       | 1     | 2      | 0     | 2   | 4     | 1                    | 1     | 6     |
| <i>ACTC1</i>                            | 0                       | 2     | 0      | 0     | 0   | 1     | 3                    | 0     | 3     |
| <i>TNNI3</i>                            | 1                       | 0     | 0      | 0     | 0   | 1     | 1                    | 1     | 2     |
| <i>TPM1</i>                             | 0                       | 0     | 0      | 0     | 0   | 2     | 2                    | 0     | 2     |
| Total                                   | 14                      | 30    | 35     | 51    | 61  | 73    | 50                   | 6     | 158   |

  

| Jackson Heart Study Cohort |                         |       |        |       |     |       |                      |       |       |
|----------------------------|-------------------------|-------|--------|-------|-----|-------|----------------------|-------|-------|
|                            | Pathogenic <sup>a</sup> |       | Benign |       | VUS |       | No Call <sup>b</sup> |       | Total |
|                            | LMM                     | ppHCM | LMM    | ppHCM | LMM | ppHCM | LMM                  | ppHCM |       |
| <i>MYBPC3</i>              | 2                       | 1     | 94     | 63    | 51  | 126   | 45                   | 0     | 186   |
| <i>MYH7</i>                | 3                       | 17    | 12     | 22    | 13  | 2     | 14                   | 1     | 42    |
| <i>MYL3</i>                | 2                       | 0     | 0      | 0     | 1   | 0     | 5                    | 1     | 8     |
| <i>TNNT2</i>               | 0                       | 1     | 0      | 0     | 2   | 2     | 2                    | 1     | 4     |
| <i>MYL2</i>                | 2                       | 4     | 0      | 1     | 1   | 2     | 4                    | 0     | 7     |
| <i>TPM1</i>                | 0                       | 3     | 0      | 0     | 1   | 3     | 5                    | 0     | 6     |
| <i>TNNI3</i>               | 0                       | 0     | 0      | 0     | 0   | 2     | 2                    | 0     | 2     |
| <i>ACTC1</i>               | 0                       | 0     | 0      | 0     | 0   | 0     | 0                    | 0     | 0     |
| Total                      | 8                       | 26    | 105    | 85    | 69  | 137   | 75                   | 3     | 244   |

LMM, the CLIA certified Partner’s Laboratory for Molecular Medicine database; ppHCM, the PolyPhen HCM algorithm; VUS, Variant of unknown significance.

<sup>a</sup>LMM pathogenic and likely pathogenic categories are grouped together here under the “Pathogenic” category. <sup>b</sup>Variants classified as “No Call” under LMM represent variants not seen by the LMM and therefore not in the LMM’s database. Polyphen HCM limits its calls to missense variants so all nonsense, indel and splice variants are listed as “No Call”.

**Table S5 Stratified summary of unscaled echocardiography measurements**

| Parameter                                                             | Framingham Heart Study |                |        |                   |                   |                  |                      | Jackson Heart Study |                |        |                   |                   |                  |                 |
|-----------------------------------------------------------------------|------------------------|----------------|--------|-------------------|-------------------|------------------|----------------------|---------------------|----------------|--------|-------------------|-------------------|------------------|-----------------|
|                                                                       | N <sup>b</sup>         | Age            | Female | LVWT <sup>c</sup> | LVDD <sup>c</sup> | LAD <sup>c</sup> | FS <sup>c</sup>      | N <sup>b</sup>      | Age            | Female | LVWT <sup>c</sup> | LVDD <sup>c</sup> | LAD <sup>c</sup> | FS <sup>c</sup> |
| <b>No Risk Factors<sup>a</sup></b>                                    | 855                    | 58.3<br>(9.2)  | 63%    | 9.6<br>(1.2)      | 47.4<br>(4.9)     | 38.4<br>(5.0)    | 0.37<br>(.06)        | 972                 | 55.5<br>(12.7) | 58%    | 9.2<br>(1.9)      | 48.2<br>(4.8)     | 34.7<br>(4.5)    | 0.39<br>(.073)  |
| <b>≥1 Sarcomere Variant</b>                                           | 158                    | 59.7<br>(9.4)  | 43%    | 10.1***<br>(1.3)  | 48.3*<br>(4.9)    | 40.1***<br>(5.0) | 0.36<br>(.05)        | 244                 | 57.9<br>(11.8) | 62%    | 9.5<br>(1.6)      | 48.5<br>(4.9)     | 35.6**<br>(4.5)  | 0.39<br>(.068)  |
| <b>MYBPC3</b>                                                         | 92                     | 59.3           | 46%    | 10.0*             | 48.6*             | 40.4***          | 0.36*                | 186                 | 58.6           | 61%    | 9.5*              | 48.8              | 36.0***          | 0.39            |
| <b>MYH7</b>                                                           | 36                     | 59.4           | 39%    | 10.0              | 48.6              | 40.4*            | 0.36                 | 42                  | 57.2           | 79%    | 8.9               | 48.1              | 34.8             | 0.40            |
| <b>MYL3</b>                                                           | 12                     | 61.8           | 42%    | 10.4              | 46.7              | 39.1             | 0.40                 | 8                   | 56.3           | 57%    | 9.5               | 46.3              | 34.0             | 0.39            |
| <b>MYL2</b>                                                           | 7                      | 61.7           | 50%    | 10.2              | 47.5              | 38.8             | 0.38                 | 4                   | 58.7           | 100%   | 9.5               | 48.0              | 34.4             | 0.45            |
| <b>TNNT2</b>                                                          | 6                      | 57.0           | 50%    | 10.8              | 47.1              | 39.9             | 0.35                 | 7                   | 51.8           | 25%    | 8.8               | 49.1              | 34.6             | 0.40            |
| <b>TPMI</b>                                                           | 3                      | 65.7           | 0%     | 10.2              | 49.9              | 36.3             | 0.37                 | 6                   | 55.0           | 40%    | 10.7              | 50.3**            | 33.5             | 0.30<br>**      |
| <b>ACTC1</b>                                                          | 2                      | 57.0           | 50%    | 1.11              | 43.3              | 38.0             | 0.41                 | 0                   |                |        |                   |                   |                  |                 |
| <b>TNNI3</b>                                                          | 2                      | 61.5           | 50%    | 10.0              | 48.0              | 39.4             | 0.38                 | 2                   |                |        | 11.6              | 43.7              | 36.6             | 0.36            |
| <b>LMM (Likely) Pathogenic</b>                                        | 14                     | 63.0<br>(10.5) | 38%    | 10.6*<br>(1.1)    | 48.2<br>(5.0)     | 39.9<br>(4.2)    | 0.34<br>(.07)        | 8                   | 54.0<br>(14.1) | 50%    | 8.9<br>(1.2)      | 47.5<br>(1.5)     | 34.7<br>(3.9)    | 0.40<br>(.069)  |
| <b>PolyPhen HCM Pathogenic</b>                                        | 30                     | 61.4<br>(9.2)  | 42%    | 10.5*<br>(1.6)    | 47.8<br>(5.8)     | 38.9<br>(5.1)    | 0.37<br>(.06)        | 26                  | 59.0<br>(13.3) | 59%    | 9.1<br>(1.6)      | 48.3<br>(4.3)     | 34.6<br>(4.2)    | 0.38<br>(.071)  |
| <b>LMM Benign</b>                                                     | 35                     | 59.2<br>(9.4)  | 32%    | 10.1<br>(1.6)     | 48.8<br>(5.0)     | 41.6***<br>(4.5) | 0.37<br>(.05)        | 105                 | 59.5<br>(11.9) | 64%    | 9.4<br>(1.5)      | 49.0<br>(5.5)     | 36.2**<br>(4.5)  | 0.39<br>(.078)  |
| <b>PolyPhen HCM Benign</b>                                            | 51                     | 59.7<br>(9.4)  | 47%    | 0.99<br>(1.2)     | 48.2<br>(4.6)     | 40.6**<br>(4.9)  | 0.37<br>(.05)        | 85                  | 59.3<br>(11.6) | 66%    | 9.5<br>(1.7)      | 48.5<br>(3.8)     | 35.4<br>(4.2)    | 0.39<br>(.062)  |
| <b>≥2 Physiologic Risk Factors<sup>a</sup></b>                        | 575                    | 62.1<br>(9.1)  | 35%    | 10.3***<br>(1.3)  | 49.3***<br>(5.2)  | 41.8***<br>(5.5) | 0.35<br>***<br>(.07) | 777                 | 58.7<br>(11.0) | 64%    | 9.8***<br>(1.6)   | 49.0***<br>(4.7)  | 35.9***<br>(4.8) | 0.39<br>(.076)  |
| <b>≥1 Sarcomere Variant + ≥2 Physiologic Risk Factors<sup>a</sup></b> | 62                     | 61.3<br>(10.2) | 32%    | 10.4***<br>(1.2)  | 49.6***<br>(4.4)  | 42.1***<br>(4.6) | 0.37<br>(.05)        | 97                  | 59.5<br>(11.1) | 64%    | 10.0***<br>(1.6)  | 48.7<br>(4.5)     | 36.5***<br>(4.0) | 0.40<br>(.063)  |

<sup>a</sup>Physiologic risk factors include hyperlipidemia, hypertension, obesity and diabetes. Standard deviations for this group are listed parenthetically. <sup>b</sup>N is number of individuals. <sup>c</sup>Measurements (in mm) of LVWT, left ventricular wall thickness; LVDD, left ventricular diastolic diameter; LAD, left atrial diameter. Significance is denoted: \*p<.05; \*\*p<.01; \*\*\*p<.001



**Table S6. Low frequency (0.5-1%) or common variants (1-10%) identified in either FHS or JHS population**

| rsID       | Gene          | Coding Coordinate | Protein      | FHS<br>MAF | JHS<br>MAF |
|------------|---------------|-------------------|--------------|------------|------------|
| rs3730238  | <i>TNNT2</i>  | chr1:201330429A>G | p.Lys247Arg  | 1.76%      | 0.00%      |
| rs3729823  | <i>MYH7</i>   | chr14:23886409C>G | p.Ser1491Cys | 1.45%      | 0.31%      |
| rs3729799  | <i>MYBPC3</i> | chr11:47355294G>A | p.Arg1002Trp | 0.06%      | 0.77%      |
| rs3729952  | <i>MYBPC3</i> | chr11:47359046C>T | p.Ala833Val  | 0.00%      | 2.27%      |
| rs35736435 | <i>MYBPC3</i> | chr11:47364234G>A | p.Gly507Arg  | 0.00%      | 0.72%      |
| rs11570076 | <i>MYBPC3</i> | chr11:47365122C>T | p.Arg382Trp  | 0.00%      | 4.29%      |
|            | <i>MYBPC3</i> | chr11:47369220G>A | p.Gly227Glu  | 0.00%      | 1.43%      |
| rs3729989  | <i>MYBPC3</i> | chr11:47370041A>G | p.Ser236Gly  | 0.00%      | 5.51%      |
|            | <i>MYBPC3</i> | chr11:47371449G>A | p.Arg176His  | 0.00%      | 1.46%      |
| rs3729986  | <i>MYBPC3</i> | chr11:47371598G>A | p.Val158Met  | 0.00%      | 2.02%      |
| rs77615401 | <i>TNNI3</i>  | chr19:55667607C>T | p.Pro82Ser   | 0.00%      | 2.09%      |

**Table S7. Number of individuals at risk in Kaplan-Meier analyses**

| Age                 | 35  | 40  | 45  | 50  | 55  | 60  | 65  |
|---------------------|-----|-----|-----|-----|-----|-----|-----|
| No Risk Factors     | 782 | 782 | 778 | 751 | 685 | 524 | 362 |
| Genetic Risk        | 99  | 99  | 98  | 96  | 84  | 67  | 39  |
| Physiologic Risk    | 495 | 490 | 482 | 450 | 418 | 359 | 251 |
| Gen. + Physio. Risk | 59  | 59  | 58  | 51  | 48  | 38  | 26  |

**Table S8. Distribution of first cardiovascular disease events observed in Kaplan-Meier analyses**

|              | MI | AP | CI | CVA | IC | CHF | Total |
|--------------|----|----|----|-----|----|-----|-------|
| None         | 10 | 18 | 2  | 10  | 6  | 2   | 48    |
| Genetic      | 6  | 5  | 0  | 0   | 2  | 1   | 14    |
| Physiologic  | 33 | 48 | 0  | 14  | 13 | 2   | 110   |
| Gen. + Phys. | 2  | 3  | 1  | 0   | 2  | 1   | 9     |

MI, myocardial infarction. AP, angina pectoris. CI, coronary insufficiency. CVA, cerebrovascular accident. IC, intermittent claudication. CHF, congestive heart failure.
